# Supplementary material for: Risks and benefits of antioxidant dietary supplement use during cancer treatment: protocol for a scoping review
Source: PubMed Central journal article supplement — BMJ Open. 2021 Apr 13;11(4):e047200. doi: 10.1136/bmjopen-2020-047200 (PMC8051392; doi:10.1136/bmjopen-2020-047200), 2021-04-13
Supplement: bmjopen-2020-047200.draft_revisions.pdf [file bmjopen-2020-047200.draft_revisions.pdf]

# BMJ Open

BMJ Open is committed to open peer review. As part of this commitment we make the peer review history of every article we publish publicly available.

When an article is published we post the peer reviewers' comments and the authors' responses online. We also post the versions of the paper that were used during peer review. These are the versions that the peer review comments apply to.

The versions of the paper that follow are the versions that were submitted during the peer review process. They are not the versions of record or the final published versions. They should not be cited or distributed as the published version of this manuscript.

BMJ Open is an open access journal and the full, final, typeset and author-corrected version of record of the manuscript is available on our site with no access controls, subscription charges or pay-per-view fees (<http://bmjopen.bmj.com>).

If you have any questions on BMJ Open's open peer review process please email [info.bmjopen@bmj.com](mailto:info.bmjopen@bmj.com)

# BMJ Open

## Risks and benefits of antioxidant dietary supplement use during cancer treatment: Protocol for a scoping review

|                               |                                                                                                                                                                                                                                                                                                                                                                                                                                                                                                                                                                                                                                                                                                                                                                                                                                                      |
|-------------------------------|------------------------------------------------------------------------------------------------------------------------------------------------------------------------------------------------------------------------------------------------------------------------------------------------------------------------------------------------------------------------------------------------------------------------------------------------------------------------------------------------------------------------------------------------------------------------------------------------------------------------------------------------------------------------------------------------------------------------------------------------------------------------------------------------------------------------------------------------------|
| Journal:                      | <i>BMJ Open</i>                                                                                                                                                                                                                                                                                                                                                                                                                                                                                                                                                                                                                                                                                                                                                                                                                                      |
| Manuscript ID                 | bmjopen-2020-047200                                                                                                                                                                                                                                                                                                                                                                                                                                                                                                                                                                                                                                                                                                                                                                                                                                  |
| Article Type:                 | Protocol                                                                                                                                                                                                                                                                                                                                                                                                                                                                                                                                                                                                                                                                                                                                                                                                                                             |
| Date Submitted by the Author: | 21-Nov-2020                                                                                                                                                                                                                                                                                                                                                                                                                                                                                                                                                                                                                                                                                                                                                                                                                                          |
| Complete List of Authors:     | <p>Wieland, L. Susan; University of Maryland School of Medicine, Center for Integrative Medicine<br/> Moffet, Ilana; University of Michigan College of Literature Science and the Arts<br/> Shade, Sydney; Geisinger Commonwealth School of Medicine<br/> Emadi, Ashkan ; University of Maryland Baltimore, School of medicine; University of Maryland Marlene and Stewart Greenebaum Comprehensive Cancer Center<br/> Knott, Cheryl; University System of Maryland, Department of Behavioral and Community Health; University of Maryland Marlene and Stewart Greenebaum Comprehensive Cancer Center, Community Outreach and Engagement<br/> Gorman, Emily; University of Maryland Baltimore, Health Sciences and Human Services Library<br/> D'Adamo, Christopher ; University of Maryland School of Medicine, Center for Integrative Medicine</p> |
| Keywords:                     | CHEMOTHERAPY, COMPLEMENTARY MEDICINE, ONCOLOGY                                                                                                                                                                                                                                                                                                                                                                                                                                                                                                                                                                                                                                                                                                                                                                                                       |
|                               |                                                                                                                                                                                                                                                                                                                                                                                                                                                                                                                                                                                                                                                                                                                                                                                                                                                      |

SCHOLARONE™  
Manuscripts

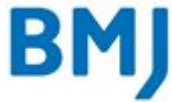

I, the Submitting Author has the right to grant and does grant on behalf of all authors of the Work (as defined in the below author licence), an exclusive licence and/or a non-exclusive licence for contributions from authors who are: i) UK Crown employees; ii) where BMJ has agreed a CC-BY licence shall apply, and/or iii) in accordance with the terms applicable for US Federal Government officers or employees acting as part of their official duties; on a worldwide, perpetual, irrevocable, royalty-free basis to BMJ Publishing Group Ltd ("BMJ") its licensees and where the relevant Journal is co-owned by BMJ to the co-owners of the Journal, to publish the Work in this journal and any other BMJ products and to exploit all rights, as set out in our [licence](#).

The Submitting Author accepts and understands that any supply made under these terms is made by BMJ to the Submitting Author unless you are acting as an employee on behalf of your employer or a postgraduate student of an affiliated institution which is paying any applicable article publishing charge ("APC") for Open Access articles. Where the Submitting Author wishes to make the Work available on an Open Access basis (and intends to pay the relevant APC), the terms of reuse of such Open Access shall be governed by a Creative Commons licence – details of these licences and which [Creative Commons](#) licence will apply to this Work are set out in our licence referred to above.

Other than as permitted in any relevant BMJ Author's Self Archiving Policies, I confirm this Work has not been accepted for publication elsewhere, is not being considered for publication elsewhere and does not duplicate material already published. I confirm all authors consent to publication of this Work and authorise the granting of this licence.

## **Risks and benefits of antioxidant dietary supplement use during cancer treatment:**

### **Protocol for a scoping review**

L. Susan Wieland<sup>1</sup>, Ilana Moffet<sup>2</sup>, Sydney Shade<sup>3</sup>, Ashkan Emadi<sup>4,5,6</sup>, Cheryl L. Knott<sup>4,7</sup>, Emily F. Gorman<sup>8</sup>, Christopher D'Adamo<sup>1</sup>

<sup>1</sup>Center for Integrative Medicine, University of Maryland School of Medicine, Baltimore MD

<sup>2</sup>University of Michigan College of Literature, Science, and the Arts, Ann Arbor MI

<sup>3</sup>Geisinger Commonwealth School of Medicine, Scranton PA

<sup>4</sup>University of Maryland Marlene and Stewart Greenebaum Comprehensive Cancer Center, Baltimore MD

<sup>5</sup>Department of Medicine, University of Maryland School of Medicine, Baltimore MD

<sup>6</sup>Department of Pharmacology, University of Maryland School of Medicine, Baltimore MD

<sup>7</sup>Department of Behavioral and Community Health, University of Maryland, College Park MD

<sup>8</sup>Health Sciences and Human Services Library, University of Maryland, Baltimore MD

**Author e-mails:** L. Susan Wieland [swieland@som.umaryland.edu](mailto:swieland@som.umaryland.edu) or [lswieland@gmail.com](mailto:lswieland@gmail.com);

Ilana Moffet [imoffet@umich.edu](mailto:imoffet@umich.edu); Sydney Shade [SShade@som.geisinger.edu](mailto:SShade@som.geisinger.edu); Ashkan Emadi

[aemadi@umm.edu](mailto:aemadi@umm.edu); Cheryl L. Knott [cholt14@umd.edu](mailto:cholt14@umd.edu); Emily F. Gorman

[efgorman@hshsl.umaryland.edu](mailto:efgorman@hshsl.umaryland.edu); Chris D'Adamo: [cdadamo@som.umaryland.edu](mailto:cdadamo@som.umaryland.edu)

**Corresponding author:** L. Susan Wieland, Center for Integrative Medicine, 520 W. Lombard Street, Baltimore MD 21201

**Keywords:** Dietary supplements, Antioxidants, Neoplasms, Chemotherapy

**Word count:** 3511

## ABSTRACT

**Introduction:** Antioxidant dietary supplements are used by many cancer patients to reduce the side effects of chemotherapy and improve prognosis. While some research indicates oral antioxidant supplementation reduces side effects and improves patient survival, other studies suggest the use of antioxidant dietary supplements may interfere with chemotherapy and reduce its curative effects. There is a need to clarify the evidence base on the impact of dietary antioxidant supplementation during chemotherapy on both side effect and treatment efficacy outcomes. We will use a scoping review approach to identify what systematic review evidence exists regarding beneficial and harmful effects of dietary antioxidant supplements when used during cancer treatment.

**Methods and analysis:** We will use Arksey & O'Malley and Joanna Briggs Institute methods for scoping reviews. We will systematically search PubMed, Embase, CINAHL, Scopus, Dissertations & Theses Global, and the Cochrane Library from inception to October 2020. Systematic reviews of randomized controlled trials of oral dietary antioxidant supplements used by participants receiving curative chemotherapy, radiotherapy, or other biological therapy for cancer will be eligible. Two reviewers will screen citations and full texts for inclusion and chart data on research questions from included reviews. Two reviewers will assess the overall confidence in systematic review results using AMSTAR-2, and summarized evidence will focus on reviews rated at high or moderate overall confidence. Tables will be used to map existing evidence and identify evidence gaps for safety and effectiveness outcomes.

**Ethics and dissemination:** This scoping review does not require ethical approval as it is a secondary assessment of available literature. The results will be presented at conferences and submitted for publication in a peer-reviewed journal. We will also disseminate results to

1  
2  
3 community and clinical stakeholders and involve them in developing subsequent research to  
4  
5 address critical existing gaps in the evidence as identified by the scoping review.  
6  
7  
8  
9  
10  
11  
12  
13  
14  
15  
16  
17  
18  
19  
20  
21  
22  
23  
24  
25  
26  
27  
28  
29  
30  
31  
32  
33  
34  
35  
36  
37  
38  
39  
40  
41  
42  
43  
44  
45  
46  
47  
48  
49  
50  
51  
52  
53  
54  
55  
56  
57  
58  
59  
60

## ARTICLE SUMMARY

### Strengths and limitations of this study

- This will be the first scoping review to provide an up-to-date overview of the available systematic review literature on the potential benefits and harms of antioxidant dietary supplement use during curative treatment for cancer.
- The review will incorporate a focus on understanding whether there is a relationship between use of antioxidant dietary supplements and the therapeutic efficacy of chemotherapy.
- The review will use the AMSTAR-2 tool to distinguish between systematic reviews providing different levels of certainty for results and emphasize reviews at overall high or moderate certainty.
- Results from this scoping review will be used to further the understanding of the breadth of antioxidant dietary supplement interventions and their effects during chemotherapy and to identify current gaps in knowledge.

## INTRODUCTION

Cancer is the second leading cause of death in the United States,[1] having a significant deleterious impact on individual patients and society at large. Approximately 1 in 2 men and 1 in 3 women will develop cancer in their lifetime.[2] Cancer treatment is a broad area of research, as cancer is a complex, dynamic set of diseases, requiring newer technologies and innovative treatments with fewer adverse effects. Conventional medical therapies for those with cancer include but are not limited to chemotherapy and radiotherapy, both of which are associated with potentially debilitating side effects and reduced quality of life.[3]

Chemotherapy is a treatment approach designed to stop cancer growth either by preventing the reproduction of new cancer cells or killing cancer cells directly. Most chemotherapy drugs target the cell cycle, by altering or damaging deoxyribonucleic acid (DNA) in the cell.[4] One of the most significant causes of oxidative stress and inflammation is related to DNA damage.[5] Additionally, anti-cancer drugs cannot distinguish between cancer cells and healthy cells, which is thought to be a reason for chemotherapy's negative side effects.[4, 6] A majority of patients receiving chemotherapy report at least one side effect from the drug, most notably fatigue, nausea, vomiting, diarrhea, pain, rash, constipation, and shortness of breath.[6] For this reason, patients receiving cancer treatment often seek complementary and alternative adjuvant therapies to reduce side effects and improve quality of life.

A popular group of complementary therapies used by cancer patients is antioxidants, which can be administered through dietary interventions, intravenous infusion, or most commonly, dietary supplementation.[7] Antioxidants are substances that act to prevent or delay cellular damage, notably by stabilizing free radicals and reducing oxidative stress. The observation in laboratory studies that antioxidants decrease oxidative stress has made the use of antioxidants



1  
2  
3 common, albeit somewhat controversial, in the attempt to prevent or treat chronic disease.[8]  
4  
5 Commonly used antioxidants include vitamins, minerals, phytochemicals and other related  
6  
7 substances, and amino acids.[9]  
8  
9

10 While antioxidant supplements are popular among the general public, the evidence on  
11  
12 antioxidant supplementation to prevent chronic disease or improve health outcomes is  
13  
14 equivocal.[10-12] Although there is an increased willingness of medical professionals to use  
15  
16 complementary therapies, the belief persists among many providers that alternative therapies could  
17  
18 harm patients.[13-15] When patients use over the counter (OTC) dietary supplements without  
19  
20 informing their physician, this may increase risk of interactions with prescription medications and  
21  
22 undermine the patient-provider relationship.[16, 17]  
23  
24  
25

26 A 2016 overview concluded that antioxidant supplementation reduces adverse effects and  
27  
28 chemotoxicities from chemotherapy, though the authors noted inconsistencies in the literature.[9]  
29  
30 The most studied oral antioxidant supplement may be melatonin, shown in vitro to have anti-tumor  
31  
32 activity when used with irradiation.[18] However, while some research suggests that oral  
33  
34 antioxidant supplementation during chemotherapy may increase patient survival, other research  
35  
36 suggests that it may diminish the efficacy of the chemotherapeutic treatment.[19, 20] There is  
37  
38 concern that antioxidant therapies may interact with the cytotoxic effects of chemotherapy,  
39  
40 lessening adverse side effects and improving quality of life, but also rendering the cancer treatment  
41  
42 less effective.[21] For example, a recently published secondary data analysis from a clinical trial  
43  
44 comparing chemotherapy schedules in breast cancer identified an increased hazard of recurrence  
45  
46 in women using antioxidant supplements both before and during chemotherapy.[22]  
47  
48  
49  
50

51 We are aware of many studies over the past twenty years that discuss dietary supplements  
52  
53 during cancer treatment; several of these are systematic reviews.[9, 23-29] However, most  
54  
55  
56  
57  
58  
59  
60

1  
2  
3 systematic reviews focus on the potential reduction in chemotherapy side effects with supplements.  
4  
5 We are not aware of a review systematically collecting evidence on the relationship between  
6  
7 antioxidant supplements and therapeutic response to chemotherapy, with the exception of one  
8  
9 review conducted more than 10 years ago.[30] Since publication of that review, there have been  
10  
11 changes in chemotherapy regimens and antioxidant use patterns, and more current systematic  
12  
13 reviews may have captured but not highlighted relevant information on response to chemotherapy.  
14  
15 There is, therefore, a need to systematically identify the best currently available evidence on this  
16  
17 topic. Currently, there is no comprehensive overview of the literature outlining the benefits and  
18  
19 harms of antioxidant supplements for patients receiving conventional cancer therapies, and  
20  
21 evidence appears particularly scant on the question of whether antioxidant supplementation may  
22  
23 negatively interact or interfere with chemotherapeutic treatment. This paucity of evidence  
24  
25 precludes the ability to make evidence-based recommendations on use of antioxidant supplements  
26  
27 by cancer patients.  
28  
29  
30  
31  
32

33 We will use scoping review methodology to identify and compile the data from previous  
34  
35 systematic reviews of randomized controlled trials (RCTs) regarding not only the reduction of  
36  
37 chemotherapy side-effects but also the efficacy of chemotherapy when oral antioxidant  
38  
39 supplements are used in conjunction by persons with cancer. A scoping review is a form of  
40  
41 knowledge synthesis that ‘aims to map key concepts, types of evidence, and gaps in a defined area  
42  
43 or field by systematically searching, selecting, and charting available evidence.’[31] Extracting  
44  
45 information from systematic reviews will allow us to identify what is known and where there  
46  
47 remain knowledge gaps on the topic. Specifically, this paper is focused on identifying 1) to what  
48  
49 extent previous systematic reviews of RCTs have assessed the efficacy of chemotherapy in the  
50  
51 presence of adjuvant antioxidant supplementation, and 2) what is known from systematic reviews  
52  
53  
54  
55  
56  
57  
58  
59  
60

of RCTs on the potential benefits and harms of adjuvant antioxidant supplementation during chemotherapy for cancer, including relationships between supplementation and the efficacy of chemotherapy. The results will inform future cancer research activities in this area.

## **METHODS**

This protocol follows the Joanna Briggs Institute (JBI) guidance on protocols for scoping reviews and has been prepared in accordance with the Preferred Reporting Items for Systematic Reviews and Meta-Analysis Protocols (PRISMA-P) checklist.[32, 33] The completed scoping review will be reported in accordance with the PRISMA extension for scoping reviews (PRISMA-ScR).[32]

We will follow the Arksey and O'Malley scoping review framework, modified by Levac 2010 and JBI (2017 and 2020),[34-38] consisting of the following steps:

- (1) Identifying the research question;
- (2) Identifying relevant studies;
- (3) Selecting studies for inclusion;
- (4) Charting data from included studies;
- (5) Collating, summarizing and reporting the results;
- (6) Consultation (optional, included).

### **Step 1: Identifying the research question**

The areas of uncertainty concerning the use of antioxidant supplements during chemotherapy for cancer have been described above. We will answer the following research questions:

- 1) Among systematic reviews of RCTs on antioxidant supplements during chemotherapy, to what extent have research questions been posed regarding the effects of antioxidant supplementation on the therapeutic efficacy of chemotherapy?

- 1  
2  
3 2) What systematic review evidence exists regarding the use of antioxidant dietary  
4 supplements during chemotherapy with respect to:  
5  
6  
7 a) whether supplementation with specific antioxidants promotes or attenuates the efficacy  
8 of chemotherapeutic treatment?  
9  
10  
11 b) improvement of chemotherapy-related side effects and quality of life? and  
12  
13  
14 c) adverse clinical effects potentially associated with antioxidant supplementation?  
15  
16

## 17 **Step 2: Identifying relevant studies**

### 18 Types of evidence sources

19  
20  
21 The types of evidence of interest for this scoping review will be systematic reviews of  
22 RCTs. This is the most efficient way to identify comprehensive evaluations of available high-  
23 quality evidence. For the purposes of this scoping review, we will define systematic reviews of  
24 RCTs as reviews that: 1) have a clear research question; 2) specify eligibility criteria for including  
25 studies; 3) seek to comprehensively identify RCTs relevant to the research question; 4) report the  
26 critical appraisal (e.g., risk of bias) of the included RCTs; and 5) present a synthesis, either  
27 quantitative or qualitative, of the characteristics and findings of the RCTs.[39] We will include  
28 systematic reviews focused on efficacy, effectiveness, or safety. While the current approach  
29 focuses on evidence from systematic reviews of RCTs, we will not exclude reviews that also seek  
30 to identify additional sources of evidence (e.g., observational studies). Furthermore, narrative  
31 (non-systematic) reviews addressing our outcomes of interest will be excluded initially but may  
32 be given secondary consideration dependent upon the quantity of systematic reviews identified.  
33 We will include both published and unpublished systematic reviews but will exclude those  
34 reported solely as conference abstracts because they generally contain limited information. We  
35 will not exclude systematic reviews on the basis of language or date of publication.  
36  
37  
38  
39  
40  
41  
42  
43  
44  
45  
46  
47  
48  
49  
50  
51  
52  
53  
54  
55  
56  
57  
58  
59  
60

### Data sources and search for studies

The initial search strategy was developed by an experienced medical information specialist (EFG) in collaboration with the remainder of the review team. The search strategy will be finalized after peer-review by another experienced medical information specialist using the PRESS Peer Review of Electronic Search Strategies.[40] Databases searched from inception will include PubMed (Pubmed.gov), Embase (Embase.com), CINAHL (EBSCOhost), Scopus (Scopus.com), Dissertations & Theses Global (ProQuest), and the Cochrane Library (WileyOnline). A combination of keywords and subject headings will be adapted for use according to the specifications of each database. All records retrieved will include at least one antioxidant-related term and a term related to cancer therapies. Examples of antioxidant terms include but are not limited to vitamin C, lycopene, and melatonin. Cancer therapy terms include but are not limited to chemotherapy, radiotherapy, antineoplastic, and anticancer. The initial search strategy for Embase is reported in Appendix 1. In addition to screening records retrieved from searching bibliographic databases, we will search the PROSPERO database of registered systematic reviews, scan the reference lists of included reviews and contact experts in the field to identify additional relevant systematic reviews.

### **Step 3: Selecting studies for inclusion**

We will use the PCC (Population, Concepts and Context) framework to implement eligibility criteria for included studies.[38]

#### *Population*

Participants with cancer who are receiving chemotherapy, radiotherapy, or other biological therapy for treatment of cancer will be sought. There will be no restrictions by population characteristics (e.g., sex, age, comorbidities, geographic location), or type or stage of cancer.

### *Concepts*

The core intervention of interest is antioxidant dietary supplements concomitant with chemotherapy, radiotherapy, or other biological therapy for cancer. We are defining antioxidant dietary supplements as orally-consumed products with known ability to prevent cellular damage by reacting with oxidizing free radicals.[41] Antioxidant dietary supplements cover a wide range of substances, including vitamins (e.g. vitamin C), minerals (e.g. selenium), amino acids (e.g. n-acetylcysteine), carotenoids (e.g. lycopene), botanicals (e.g. polyphenols), and hormones (e.g. melatonin). Studies involving IV administration of antioxidants in a medical setting (e.g., IV vitamin C) will be excluded from this scoping review. Oral and IV antioxidants are not only processed differently by the body but oral supplements may be taken by patients without direct assistance of medical professionals, and thus have different clinical and public health implications. Studies involving mushrooms and mushroom products will be excluded because their mechanism is primarily through immunomodulation.[42] Studies involving compound herbal formulas will also be excluded due to the potential for multiple mechanisms of activity that confound the research question. Finally, although many foods such as fruits and vegetables are good sources of antioxidants, whole food dietary interventions (e.g., changes in food habits) will also be excluded from this scoping review due to the potential for confounding by non-antioxidant dietary components with known activity against cancer (e.g., histone deacetylase (HDAC)-inhibition, DNA methylation).[43, 44]

The core outcomes of interest will consist of 1) therapeutic response to treatment with chemotherapy, radiotherapy, or other biological therapy, 2) improvements in chemotherapy-related side effects and quality of life, and 3) increases in adverse effects potentially related to antioxidant supplementation. Response to treatment may be measured as mortality or with

1  
2  
3 indicators of morbidity (e.g., cancer progression, recurrence). Because it may not be possible to  
4 establish whether side effects and other adverse events are more likely related to the cancer  
5 treatment or to the supplement use, we will document when adverse events are presented within  
6 the reviews as side effects due to either cancer treatment or supplement use, but we will discuss  
7 the findings both separately and jointly. We will include outcomes measured at any time point.  
8  
9  
10  
11  
12  
13

#### 14 *Context*

15  
16 The context is cancer treatment with curative intent. The palliative use of chemotherapy,  
17 radiotherapy, or other biological therapies will be excluded because a core aspect of this scoping  
18 review is the evaluation of the evidence on antioxidant supplements with regard to possible  
19 interference with the curative objectives of treatment. We will not restrict context by date,  
20 healthcare setting or country.  
21  
22  
23  
24  
25  
26  
27

#### 28 Data management

29  
30 Citations for retrieved records will be downloaded into EndNote X8 and deduplicated.  
31 Citations will then be uploaded to Covidence and screened for inclusion in two stages.[45] At the  
32 first stage, two team members will independently screen all records for relevance on the basis of  
33 record title and abstract. Prior to title and abstract screening, the team members will carry out a  
34 pilot screening of randomly selected records, to ensure that they understand and agree upon the  
35 initial inclusion criteria. During the title and abstract screening, discrepancies between screeners  
36 will regularly be resolved, to prevent development and continuation of differing interpretations of  
37 the inclusion criteria.[46] All records that are deemed to be potentially relevant to the scoping  
38 review will progress to full text screening. Once records are ready for full text screening, a  
39 calibration exercise will be performed in which all team members screen a set of the same  
40 randomly selected 25 records against the inclusion and exclusion criteria for the review. The results  
41  
42  
43  
44  
45  
46  
47  
48  
49  
50  
51  
52  
53  
54  
55  
56  
57  
58  
59  
60

1  
2  
3 of this screening will be compared between team members, and any necessary clarifications to the  
4 inclusion and exclusion criteria, or modifications of those criteria, will be made and documented  
5 in the completed scoping review. After any clarification or modification of the selection criteria,  
6 and agreement among the team on the results of the calibration exercise, two team members will  
7 independently screen each full text record for inclusion. Discrepancies between screeners will be  
8 resolved by discussion or involvement of a third team member. The study citation and brief reason  
9 for exclusion will be provided for each excluded record and a flow chart of the screening process  
10 will be provided in accordance with PRISMA-ScR.  
11  
12  
13  
14  
15  
16  
17  
18  
19  
20

#### 21 **Step 4: Charting data from included studies**

22  
23  
24 Data will be extracted from each included systematic review. These data will include  
25 bibliographic information (e.g., authors, date of publication, journal of publication), information  
26 on the methods (e.g. the research question, study enrollment criteria and design), information on  
27 results, and the key findings for each included review. See Appendix 2 for a draft of the data  
28 charting form displaying the elements to be extracted from each review. To ensure that the data  
29 charting form is comprehensive and clear, we will pilot test the form prior to embarking on the full  
30 data extraction. Three members of the author team will use the form to chart data from the same  
31 three reviews and compare the extracted information across authors. Anything that is unclear or  
32 missing from the data charting form will be discussed and clarifications and modifications will be  
33 addressed in collaboration with the full author team until all authors are satisfied that the data  
34 charting form is suitable for extraction of all relevant results. Data extraction will then be carried  
35 out for each study by one author and verified by a second author.  
36  
37  
38  
39  
40  
41  
42  
43  
44  
45  
46  
47  
48  
49  
50

#### 51 Quality Assessment



1  
2  
3 Methodological shortcomings in the conduct of systematic reviews may lead to incomplete  
4 and biased findings and reduce our confidence in review conclusions. Therefore, in addition to  
5 extracting key data from all systematic reviews, we will carry out and report an assessment of the  
6 conduct of each of the included systematic reviews, using the updated version of AMSTAR (A  
7 Measurement Tool to Assess Systematic Reviews) (AMSTAR-2).[47] AMSTAR-2 is a critical  
8 appraisal tool for systematic review conduct that can be used to assess the overall confidence in  
9 systematic review results at one of four levels: high, moderate, low, and critically low. The  
10 interpretation of an overall high level of confidence is that “the systematic review provides an  
11 accurate and comprehensive summary of the results of the available studies that address the  
12 question of interest,” while the interpretation of an overall low level of confidence is that “the  
13 review has a critical flaw and may not provide an accurate and comprehensive summary of the  
14 available studies that address the question of interest.”[47] See Appendix 3 for the AMSTAR-2  
15 rating criteria, rubric, and interpretation for overall assessment of confidence in review results.  
16 AMSTAR-2 assessment will be carried out for each study by one author and verified by a second  
17 author.

18 Although critical assessment of the evidence is optional for scoping reviews, we wish to  
19 focus on available systematic review evidence in which we can have confidence. We will therefore  
20 focus our presentation on systematic reviews rated as at overall moderate or high level of  
21 confidence with AMSTAR-2. We will highlight the charted data extracted from these reviews,  
22 and we may also extract additional data, using the methods described above to develop and pilot  
23 an additional data charting form, to capture further details on the findings of these reviews.

### 24 **Step 5: Collating, summarizing and reporting the results**

1  
2  
3 As scoping reviews do not formally synthesize the evidence, this review will provide a  
4 descriptive summary of the evidence by calculating frequencies for data elements and mapping  
5 this evidence against the objectives of the review. For example, we will identify evidence on  
6 individual antioxidants with regard to the questions of interest from each review, indicating the  
7 underlying populations (types and stages of cancer, chemotherapeutic regimens) the evidence is  
8 sourced from, and the AMSTAR-2 rating of the reviews providing this information. Results will  
9 be presented in tables and charts. We will conclude by discussing whether we believe there is  
10 reliable systematic review evidence on the potential benefits and risks of antioxidant supplements  
11 during chemotherapy and suggesting potential avenues for further research.  
12  
13  
14  
15  
16  
17  
18  
19  
20  
21  
22  
23

#### 24 **Step 6: Consultation**

25  
26 As described under the Data sources and search for studies, we will consult experts in the  
27 field to identify additional systematic reviews not found through database searching. We will also  
28 consult with stakeholders in cancer treatment (e.g., clinicians, patients) to inform the elements to  
29 be included in the data charting. Through consultation with these stakeholders we will ensure that  
30 relevant characteristics of the populations, interventions, and outcomes are captured and important  
31 gaps in the evidence may be identified. In keeping with best practices in community-engaged  
32 research, we will disseminate the findings of the review to community stakeholders and patients.  
33 Community engagement will also be used to inform recommendations for future research based  
34 on the review.  
35  
36  
37  
38  
39  
40  
41  
42  
43  
44  
45  
46

#### 47 **Ethics and dissemination**

48  
49 This scoping review does not require ethics approval as it is a secondary review of the  
50 literature. Based upon the results of this review, we will disseminate our findings of both reliable  
51 evidence (where it exists) or a gap in reliable evidence and a need for additional research. This  
52  
53  
54  
55  
56  
57  
58  
59  
60

1  
2  
3 dissemination will be carried out through presentations at relevant conferences and publication in  
4 a peer-reviewed open-access journal. As mentioned above, we will also disseminate the findings  
5 to community and patient stakeholders. We will ask these stakeholders to join with clinical and  
6 research stakeholders to identify the best ways to address any critical existing gaps in the evidence  
7 (e.g., a focused systematic review, further randomized trials) and prioritize the next steps.  
8  
9

### 14 **Patient and public involvement**

15  
16 As described above, we will consult with patients to inform the development of data  
17 charting. We will also engage with patients, clinicians and other stakeholders to disseminate  
18 summaries of the review findings in appropriate formats and venues. Finally, we will involve  
19 patients and the public in developing and prioritizing future research activities based upon the  
20 findings of this project.  
21  
22  
23  
24  
25  
26  
27

## 28 **DISCUSSION**

### 30 **Implications**

31  
32 We will use the findings from this review to develop to develop future research priorities  
33 and initiatives to help fill remaining critical gaps in the current literature and contribute to key next  
34 steps. We will then work with patients and clinicians to prioritize evidence needs, and consult with  
35 clinical, research, and patient stakeholders on the most appropriate methods (e.g., new or updated  
36 systematic reviews versus additional primary studies) for addressing these gaps. Near the end of  
37 the scoping review process, when we are able to characterize the extent of available reliable  
38 evidence, we will begin to formalize partners and processes for these next steps.  
39  
40  
41  
42  
43  
44  
45  
46  
47  
48

### 49 **Potential limitations and mitigation strategies**

50  
51 Though scoping the entirety of observational and clinical evidence on this topic is beyond  
52 the scope of the current initiative, we believe that focusing on systematic reviews is the most  
53  
54  
55  
56  
57  
58  
59  
60

1  
2  
3 efficient way to characterize the weight of the current research evidence. We are also uncertain  
4  
5 about the volume of review evidence, which makes it difficult to plan ahead for either superficial  
6  
7 or very detailed data extraction. The iterative nature of scoping reviews allows us to be flexible in  
8  
9 response to the quantity and quality of the evidence and prioritize summarizing evidence according  
10  
11 to characteristics such as review quality or recency. Regular engagement with clinical and research  
12  
13 partners during the conduct of the scoping review will allow us to modify our methods in such a  
14  
15 way as to develop summaries of review evidence that are maximally relevant and useful to inform  
16  
17 practice. We plan to ensure the transparency of our methods by devoting a section of the final  
18  
19 publication to changes from and refinements to this protocol, together with the rationale for any  
20  
21 revisions. At the conclusion of this project we will develop a plan, including potential future  
22  
23 funding applications, for the next steps in a research agenda to inform decisions by patients and  
24  
25 providers on the potential benefits or harms of dietary antioxidant supplementation during  
26  
27 chemotherapy.  
28  
29  
30  
31  
32  
33  
34  
35  
36  
37  
38  
39  
40  
41  
42  
43  
44  
45  
46  
47  
48  
49  
50  
51  
52  
53  
54  
55  
56  
57  
58  
59  
60

1  
2  
3 **Acknowledgements:** We thank Becky Skidmore, MLS (Senior Information Specialist  
4 consultant, Ottawa, ON) for her peer review of the Embase search strategy. We would also like  
5 to acknowledge Drs. Brian Hutton and Chantelle Garrity (Knowledge Synthesis Group, Ottawa  
6 Hospital Research Institute) for their methodological input and guidance in developing this  
7 protocol.  
8  
9

10  
11  
12  
13  
14 **Author Contributions:** AE, CLK, and CD jointly conceived the study and developed the  
15 research questions. LSW proposed the scoping review methodology and developed the protocol  
16 with IM and SS. EFG developed the search strategy. LSW drafted the manuscript. All authors  
17 revised the manuscript and approved the final text. LSW is guarantor of the review.  
18  
19

20  
21  
22  
23 **Funding:** LSW is supported by the National Center for Complementary and Integrative Health  
24 of the National Institutes of Health (R24 AT001293). AE and CLK are supported by the  
25 University of Maryland Greenebaum Comprehensive Cancer Center Support Grant  
26 (P30CA134274) and the State of Maryland's Cigarette Restitution Funds (N/A). The funders had  
27 no role in developing the protocol.  
28  
29

30  
31  
32  
33 **Competing interests:** None declared.  
34

35  
36  
37 **Patient consent for publication:** Not required.  
38

39  
40  
41  
42 **Data statement:** This is a secondary analysis of publicly available literature. Data sharing not  
43 applicable as no datasets generated and/or analyzed for this study.  
44

#### 45 **ORCID ID**

46  
47 L Susan Wieland <https://orcid.org/0000-0003-2157-0603>

48  
49 Ashkan Emadi <https://orcid.org/0000-0003-3769-3210>

50  
51 Cheryl L. Knott <https://orcid.org/0000-0002-2261-7875>

52  
53 Emily F. Gorman <https://orcid.org/0000-0002-1210-1082>  
54  
55  
56  
57  
58  
59  
60

1  
2  
3 Christopher D'Adamo <https://orcid.org/0000-0002-2415-8158>  
4  
5  
6  
7  
8  
9  
10  
11  
12  
13  
14  
15  
16  
17  
18  
19  
20  
21  
22  
23  
24  
25  
26  
27  
28  
29  
30  
31  
32  
33  
34  
35  
36  
37  
38  
39  
40  
41  
42  
43  
44  
45  
46  
47  
48  
49  
50  
51  
52  
53  
54  
55  
56  
57  
58  
59  
60

For peer review only

## REFERENCES

1. Centers for Disease Control and Prevention. An Update on Cancer Deaths in the United States. *Atlanta, GA: US Department of Health and Human Services, Centers for Disease Control and Prevention, Division of Cancer Prevention and Control* 2020.
2. Cancer.org. Lifetime Risk of Developing or Dying From Cancer. 2020 <https://www.cancer.org/cancer/cancer-basics/lifetime-probability-of-developing-or-dying-from-cancer.html> (Accessed August 10, 2020).
3. National Cancer Institute. NCI Dictionary of Cancer Terms - Conventional Treatment. 2020. <https://www.cancer.gov/publications/dictionaries/cancer-terms/def/conventional-treatment> (Accessed August 10, 2020).
4. National Cancer Institute. NCI Dictionary of Cancer Terms - Chemotherapy. 2020. <https://www.cancer.gov/publications/dictionaries/cancer-terms/def/chemotherapy> (Accessed August 10, 2020).
5. Cellbiolabs.com. DNA Damage: Causes and Effects. 2019. <https://www.cellbiolabs.com/DNA-Damage-Causes-Effects> (Accessed August 10, 2020).
6. Pearce A, Haas M, Viney R, et al. Incidence and severity of self-reported chemotherapy side effects in routine care: A prospective cohort study. *PLoS One* 2017;12(10).
7. Kantor ED, Rehm CD, Du M, et al. Trends in dietary supplement use Among US adults from 1999-2012. *JAMA* 2016;316(14):1464-74.
8. National Center for Complementary and Integrative Health. Antioxidants in depth. 2013. <https://www.nccih.nih.gov/health/antioxidants-in-depth> (Accessed August 10, 2020).
9. Yasueda A, Urushima H, Ito T. Efficacy and interaction of antioxidant supplements as adjuvant therapy in cancer treatment: a systematic review. *Integr Cancer Ther* 2016;15(1):17-39.
10. Evans JR, Lawrenson JG. Antioxidant vitamin and mineral supplements for preventing age-related macular degeneration. *Cochrane Database Syst Rev* 2017 Jul 30;7(7):CD000253.
11. Cortés-Jofré M, Rueda J-R, Asenjo-Lobos C, et al. Drugs for preventing lung cancer in healthy people. *Cochrane Database Syst Rev* 2020 Mar 4;3(3):CD002141.
12. Huang HY, Caballero B, Chang S, et al. Multivitamin/mineral supplements and prevention of chronic disease. *Evid Rep Technol Assess* 2006(139):1-117.
13. Stub T, Quandt SA, Arcury TA, et al. Perception of risk and communication among conventional and complementary health care providers involving cancer patients' use of complementary therapies: a literature review. *BMC Complement Altern Med* 2016;16(1):353.
14. Wahner-Roedler DL, Lee MC, Chon TY, et al. Physicians' attitudes toward complementary and alternative medicine and their knowledge of specific therapies: 8-Year follow-up at an academic medical center. *Complement Ther Clin Pract* 2014;20(1):54-60.
15. Kim SH, Shin DW, Nam YS, et al. Expected and perceived efficacy of complementary and alternative medicine: A comparison views of patients with cancer and oncologists. *Complement Ther Med* 2016;28:29-36.
16. Hardy ML. Dietary supplement use in cancer care: help or harm. *Hematol Oncol Clin North Am* 2008;22(4):581-617.
17. U.S. Food and Drug Administration. Mixing Medications and Dietary Supplements Can Endanger Your Health. 2014. <https://www.fda.gov/consumers/consumer-updates/mixing-medications-and-dietary-supplements-can-endanger-your-health> (Accessed August 29, 2020).
18. Farhood B, Goradel NH, Mortezaee K, et al. Melatonin as an adjuvant in radiotherapy for radioprotection and radiosensitization. *Clin Transl Oncol* 2019;21(3):268-79.

19. Block KI, Koch AC, Mead MN, et al. Impact of antioxidant supplementation on chemotherapeutic efficacy: A systematic review of the evidence from randomized controlled trials. *Cancer Treat Rev*; 2007. p. 407-18.
20. Poljsak B, Milisav I. The role of antioxidants in cancer, friends or foes? *Curr Pharm Des* 2019;24(44):5234-44.
21. Athreya K, Xavier MF. Antioxidants in the treatment of cancer. *Nutr Cancer* 2017;69(8):1099-104.
22. Ambrosone CB, Zirpoli GR, Hutson AD, et al. Dietary supplement use during chemotherapy and survival outcomes of patients with breast cancer enrolled in a cooperative group clinical trial (SWOG S0221). *J Clin Oncol* 2020;38(8):804-14.
23. Nakayama A, Alladin KP, Igbokwe O, et al. Systematic review: generating evidence-based guidelines on the concurrent use of dietary antioxidants and chemotherapy or radiotherapy. *Cancer Invest* 2011;29(10):655-67.
24. Ladas EJ, Jacobson JS, Kennedy DD, et al. Antioxidants and cancer therapy: a systematic review. *J Clin Oncol* 2004;22(3):517-28.
25. Dennert G, Horneber M. Selenium for alleviating the side effects of chemotherapy, radiotherapy and surgery in cancer patients. *Cochrane Database Syst Rev* 2006 Jul 19(3):CD005037.
26. Chen Mh, May BH, Zhou IW, et al. Integrative medicine for relief of nausea and vomiting in the treatment of colorectal cancer using oxaliplatin-based chemotherapy: a systematic review and meta-analysis. *Phytother Res* 2016;30(5):741-53.
27. Nayeri N, Bakhshi F, Khosravi A, et al. The effect of complementary and alternative medicines on quality of life in patients with breast cancer: A systematic review. *Indian J Palliat Care* 2020;26(1):95-104.
28. Schloss JM, Colosimo M, Airey C, et al. Nutraceuticals and chemotherapy induced peripheral neuropathy (CIPN): a systematic review. *Clin Nutr* 2013;32(6):888-93.
29. Wang Y-m, Jin B-z, Ai F, et al. The efficacy and safety of melatonin in concurrent chemotherapy or radiotherapy for solid tumors: a meta-analysis of randomized controlled trials. *Cancer Chemother Pharmacol* 2012;69(5):1213-20.
30. Block KI, Koch AC, Mead MN, et al. Impact of antioxidant supplementation on chemotherapeutic efficacy: A systematic review of the evidence from randomized controlled trials. *Cancer Treat Rev* 2007;33(5):407-18.
31. Colquhoun HL, Levac D, O'Brien KK, et al. Scoping reviews: time for clarity in definition, methods, and reporting. *J Clin Epidemiol* 2014;67(12):1291-4.
32. Tricco AC, Lillie E, Zarin W, et al. PRISMA extension for scoping reviews (PRISMA-ScR): checklist and explanation. *Ann Intern Med* 2018;169(7):467-73.
33. Moher D, Shamseer L, Clarke M, et al. Preferred reporting items for systematic review and meta-analysis protocols (PRISMA-P) 2015 statement. *Syst Rev* 2015;4(1):1.
34. Arksey H, O'Malley L. Scoping studies: towards a methodological framework. *International Journal of Social Research Methodology: Theory and Practice* 2005;8(1):19-32.
35. Levac D, Colquhoun H, O'Brien KK. Scoping studies: advancing the methodology. *Implement Sci* 2010;5(1):1-9.
36. Peters MDJ, Godfrey CM, Khalil H, et al. Guidance for conducting systematic scoping reviews. *International Journal of Evidence-Based Healthcare* 2015;13(3):141-6.
37. Peters MDJ, Godfrey CM, McInerney P, et al. Chapter 11: Scoping Reviews. In: Aromataris E, Munn Z, editors. Joanna Briggs Institute Reviewer's Manual JBI, 2017.



- 1  
2  
3 38. Peters M, Godfrey C, McInerney P, et al. Chapter 11: Scoping Reviews (2020 version).  
4 In: Aromataris E, Munn Z, editors. JBI Manual for Evidence Synthesis JBI, 2020. Available  
5 from <https://synthesismanual.jbi.global>. <https://doi.org/10.46658/JBIMES-20-12> (Accessed 7  
6 October 2020).  
7  
8 39. Higgins J, Thomas J, Chandler J, et al., editors. Cochrane Handbook for Systematic  
9 Reviews of Interventions version 6.0 (updated July 2019): Cochrane; 2019 Available at  
10 [www.training.cochrane.org/handbook](http://www.training.cochrane.org/handbook).  
11  
12 40. McGowan J, Sampson M, Salzwedel DM, et al. PRESS peer review of electronic search  
13 strategies: 2015 guideline statement. *J Clin Epidemiol* 2016;75:40-6.  
14  
15 41. Trueba GP, Sanchez GM, Giuliani A. Oxygen free radical and antioxidant defense  
16 mechanism in cancer. *Front Biosci* 2004;9:2029-44.  
17  
18 42. De Silva DD, Rapior S, Fons F, et al. Medicinal mushrooms in supportive cancer  
19 therapies: an approach to anti-cancer effects and putative mechanisms of action. *Fungal*  
20 *Diversity* 2012;55:1-35.  
21  
22 43. Moreno CL, Mobbs CV. Epigenetic mechanisms underlying lifespan and age-related  
23 effects of dietary restriction and the ketogenic diet. *Mol Cell Endocrinol* 2017;455:33-40.  
24  
25 44. Fasanelli F, Giraud MT, Vineis P, et al. DNA methylation, colon cancer and  
26 Mediterranean diet: results from the EPIC-Italy cohort. *Epigenetics* 2019;14(10):977-88.  
27  
28 45. Covidence systematic review software. Veritas Health Innovation, Melbourne, Australia.  
29 Available at [www.covidence.org](http://www.covidence.org).  
30  
31 46. Polanin JR, Pigott TD, Espelage DL, et al. Best practice guidelines for abstract screening  
32 large-evidence systematic reviews and meta-analyses. *Res Synth Methods* 2019;10(3):330-42.  
33  
34 47. Shea BJ, Reeves BC, Wells G, et al. AMSTAR 2: a critical appraisal tool for systematic  
35 reviews that include randomised or non-randomised studies of healthcare interventions, or both.  
36 *BMJ* 2017;j4008-j.  
37  
38  
39  
40  
41  
42  
43  
44  
45  
46  
47  
48  
49  
50  
51  
52  
53  
54  
55  
56  
57  
58  
59  
60

## APPENDIX 1 – EMBASE PRELIMINARY SEARCH STRATEGY

**Embase (Embase.com) – 7253** references retrieved on 06 October 2020

One-line search run in Results tab of Embase.com platform:

('antioxidant'/exp OR antioxidant\*:ti,ab,kw OR 'anti-oxidant\*':ti,ab,kw OR antioxidat\*:ti,ab,kw OR 'anti-oxidat\*':ti,ab,kw OR 'antioxidant activity'/exp OR 'acetylcysteine'/exp OR acetylcystein\*:ti,ab,kw OR 'acetyl cysteine':ti,ab,kw OR acetadote:ti,ab,kw OR mucomyst:ti,ab,kw OR cetylev:ti,ab,kw OR 'arginine'/exp OR arginin\*:ti,ab,kw OR 'ascorbic acid'/exp OR 'ascorbic acid\*':ti,ab,kw OR 'vitamin c':ti,ab,kw OR ascorbate:ti,ab,kw OR 'ascorbyl palmitate':ti,ab,kw OR 'carotenoid'/exp OR caroten\*:ti,ab,kw OR 'coumarin'/exp OR coumarin\*:ti,ab,kw OR cumarin\*:ti,ab,kw OR 'curcumin'/exp OR curcumin\*:ti,ab,kw OR turmeric:ti,ab,kw OR 'ellagic acid'/exp OR 'ellagic acid\*':ti,ab,kw OR 'benzoic acid\*':ti,ab,kw OR 'benzoaric acid\*':ti,ab,kw OR 'melatonin'/exp OR melatonin\*:ti,ab,kw OR circadin:ti,ab,kw OR 'polyphenol'/exp OR polyphenol\*:ti,ab,kw OR 'retinol'/exp OR retinol:ti,ab,kw OR 'vitamin a':ti,ab,kw OR 'retinyl palmitate':ti,ab,kw OR 'retinoic acid\*':ti,ab,kw OR 'selenium'/exp OR selenium:ti,ab,kw OR selenicum:ti,ab,kw OR 'tocopherol'/exp OR tocopherol\*:ti,ab,kw OR tocoferol:ti,ab,kw OR 'vitamin e':ti,ab,kw OR 'ubiquinone'/exp OR ubiquinone:ti,ab,kw OR 'vitamin q':ti,ab,kw OR 'coenzyme q10':ti,ab,kw OR coq10:ti,ab,kw OR 'coenzyme q':ti,ab,kw OR 'zinc'/exp OR zinc:ti,ab,kw OR zincum:ti,ab,kw OR 'thioctic acid'/exp OR 'thioctic acid\*':ti,ab,kw OR 'lipoic acid\*':ti,ab,kw OR 'resveratrol'/exp OR resveratrol:ti,ab,kw OR 'glutathione'/exp OR glutathione:ti,ab,kw OR glutathiol:ti,ab,kw OR 'chlorogenic acid'/exp OR 'chlorogenic acid\*':ti,ab,kw OR 'ferulic acid'/exp OR 'ferulic acid\*':ti,ab,kw OR 'ferulate sodium':ti,ab,kw OR 'sodium ferulate':ti,ab,kw OR 'lycopene'/exp OR lycopene:ti,ab,kw OR

1  
2  
3 'docosahexaenoic acid'/exp OR docosahexaeno\*:ti,ab,kw OR 'icosapentaenoic acid'/exp OR  
4  
5 'icosapentaenoic acid\*:ti,ab,kw OR 'eicosapentaenoic acid\*:ti,ab,kw OR 'vitamin  
6  
7 supplementation'/exp OR 'vitamin supplement\*:ti,ab,kw OR 'hibiscus'/exp OR hibiscus:ti,ab,kw  
8  
9  
10 OR 'folic acid'/exp OR 'folic acid\*:ti,ab,kw OR folate:ti,ab,kw OR 'catechin'/exp OR  
11  
12 catechin\*:ti,ab,kw OR 'catechuic acid\*:ti,ab,kw OR ciandiol:ti,ab,kw OR 'anthocyanidin'/exp  
13  
14 OR anthocyanidin:ti,ab,kw OR 'tannin'/exp OR tannin\*:ti,ab,kw OR 'tannic acid\*:ti,ab,kw OR  
15  
16 gallotanni\*:ti,ab,kw OR 'rutoside'/exp OR rutoside:ti,ab,kw OR rutin:ti,ab,kw OR  
17  
18 rutin:ti,ab,kw OR 'vitamin p':ti,ab,kw OR 'isoflavone'/exp OR isoflavone\*:ti,ab,kw OR  
19  
20 'quercetin'/exp OR quercetin\*:ti,ab,kw OR quercitin\*:ti,ab,kw OR quercetol\*:ti,ab,kw OR  
21  
22 'lignan'/exp OR lignan\*:ti,ab,kw OR 'allicin'/exp OR allicin:ti,ab,kw OR '5  
23  
24 methoxytryptamine'/exp OR methoxytryptamine:ti,ab,kw OR mexamine:ti,ab,kw OR 'uric  
25  
26 acid'/exp OR 'uric acid\*:ti,ab,kw OR 'urobilinogen'/exp OR urobilinogen:ti,ab,kw OR  
27  
28 urinobilinogen:ti,ab,kw OR 'melanoidin'/exp OR melanoidin:ti,ab,kw OR 'phytic acid'/exp OR  
29  
30 'phytic acid\*:ti,ab,kw OR 'phytinic acid\*:ti,ab,kw OR 'saponin'/exp OR saponin\*:ti,ab,kw OR  
31  
32 glycosaponin\*:ti,ab,kw OR 'methionine'/exp OR methionin\*:ti,ab,kw OR  
33  
34 levomethionine:ti,ab,kw OR methiolate:ti,ab,kw OR 'albumin'/exp OR albumin:ti,ab,kw OR  
35  
36 albumen:ti,ab,kw OR 'lactoferrin'/exp OR lactoferrin\*:ti,ab,kw OR lactotransferrin\*:ti,ab,kw OR  
37  
38 'chromium'/exp OR chromium:ti,ab,kw OR 'transferrin'/exp OR transferrin\*:ti,ab,kw OR  
39  
40 siderophilin:ti,ab,kw OR 'ferritin'/exp OR ferritin\*:ti,ab,kw OR immunoferritin:ti,ab,kw OR  
41  
42 'manganese'/exp OR manganese:ti,ab,kw OR cutaval:ti,ab,kw OR 'molybdenum'/exp OR  
43  
44 molybden\*:ti,ab,kw OR 'fish oil'/exp OR 'fish oil\*:ti,ab,kw OR promega:ti,ab,kw OR 'omega 3  
45  
46 fatty acid'/exp OR 'omega 3 fatty acid\*:ti,ab,kw OR 'omega 3 carboxylic acid\*:ti,ab,kw OR  
47  
48 'alternative medicine'/de OR 'alternative medicine\*:ti,ab,kw OR 'complementary  
49  
50  
51  
52  
53  
54  
55  
56  
57  
58  
59  
60

1  
2  
3 medicine\*:ti,ab,kw OR 'complementary therap\*:ti,ab,kw OR 'diet supplementation'/exp OR  
4 'diet\* supplement\*:ti,ab,kw) AND ('chemotherapy'/exp OR chemotherap\*:ti,ab,kw OR  
5 'radiotherapy'/exp OR radiotherap\*:ti,ab,kw OR 'cancer therapy'/exp OR (((cancer OR radiation  
6 OR irradiation OR tumor\* OR tumour\* OR neoplas\* OR oncolog\*) NEAR/3 (therap\* OR treat\*  
7 OR inhibit\*)):ti,ab,kw) OR 'adjuvant radiotherapy'/exp OR 'antineoplastic agent'/exp OR  
8 anticancer\*:ti,ab,kw OR 'anti-cancer\*:ti,ab,kw OR anticarcinogen\*:ti,ab,kw OR 'anti-  
9 carcinogen\*:ti,ab,kw OR 'antineoplastic activity'/exp OR antineoplastic\*:ti,ab,kw OR 'anti-  
10 neoplastic\*:ti,ab,kw OR antitumor:ti,ab,kw OR 'anti-tumor':ti,ab,kw OR antitumour:ti,ab,kw OR  
11 'anti-tumour':ti,ab,kw OR 'chemoradiotherapy'/exp OR chemoradiotherap\*:ti,ab,kw OR  
12 'alkylating agent\*:ti,ab,kw OR alkylator\*:ti,ab,kw OR 'antimetabolite'/exp OR  
13 antimetaboli\*:ti,ab,kw OR 'anti-metaboli\*:ti,ab,kw OR 'antimitotic agent'/exp OR  
14 antimitotic\*:ti,ab,kw OR 'anti-mitotic\*:ti,ab,kw OR 'mitotic inhibitor\*:ti,ab,kw OR 'mitosis  
15 inhibitor\*:ti,ab,kw OR 'anthracycline'/exp OR anthracyclin\*:ti,ab,kw OR 'protein tyrosine kinase  
16 inhibitor'/exp OR 'tyrosine kinase inhibitor\*:ti,ab,kw OR tki:ti,ab,kw OR 'tyrosine protein kinase  
17 inhibitor\*:ti,ab,kw OR 'protein serine threonine kinase inhibitor'/exp OR 'serine threonine kinase  
18 inhibitor\*:ti,ab,kw OR 'checkpoint inhibitor'/exp OR 'checkpoint inhibitor\*:ti,ab,kw OR 'anti  
19 pd1':ti,ab,kw OR 'anti pd11':ti,ab,kw OR 'antimyeloma activity'/exp OR antimyeloma\*:ti,ab,kw  
20 OR 'anti-myeloma\*:ti,ab,kw OR 'dna topoisomerase inhibitor'/exp OR 'topoisomerase  
21 inhibitor\*:ti,ab,kw OR 'topoisomerase 1 inhibitor\*:ti,ab,kw OR 'topoisomerase i  
22 inhibitor\*:ti,ab,kw OR 'antiandrogen'/exp OR 'antiandrogen therapy'/exp OR 'anti-  
23 androgen\*:ti,ab,kw OR antiandrogen\*:ti,ab,kw OR 'androgen antagonist\*:ti,ab,kw OR  
24 'antiestrogen'/exp OR 'anti-estrogen\*:ti,ab,kw OR 'anti-oestrogen\*:ti,ab,kw OR  
25 antiestrogen\*:ti,ab,kw OR antioestrogen\*:ti,ab,kw OR 'estrogen antagonist\*:ti,ab,kw OR

1  
2  
3 'oestrogen antagonist':ti,ab,kw OR 'cancer hormone therapy'/exp OR 'cancer hormone  
4 therap\*:ti,ab,kw OR 'cancer patient'/exp OR 'cancer patient\*:ti,ab,kw OR 'oncolog\*  
5 patient\*:ti,ab,kw OR electrochemotherap\*:ti,ab,kw OR photochemotherap\*:ti,ab,kw OR  
6 chemoembolization:ti,ab,kw OR chemoembolisation:ti,ab,kw OR carcinochemotherap\*:ti,ab,kw  
7 OR multichemotherap\*:ti,ab,kw OR polychemotherap\*:ti,ab,kw OR antileukemi\*:ti,ab,kw OR  
8 'anti-leukemi\*:ti,ab,kw OR antileukaemi\*:ti,ab,kw OR 'anti-leukaemi\*:ti,ab,kw OR  
9 antimetasta\*:ti,ab,kw OR 'anti-metasta\*:ti,ab,kw OR antimutagen\*:ti,ab,kw OR 'anti-  
10 mutagen\*:ti,ab,kw) AND (metaanaly\*:ti,ab,kw OR 'met analy\*:ti,ab,kw OR 'meta  
11 analy\*:ti,ab,kw OR metanaly\*:ti,ab,kw OR 'meta analysis'/exp OR 'meta analysis (topic)/exp  
12 OR 'systematic review'/exp OR 'systematic review (topic)/exp OR (((systematic\* OR  
13 methodologic\* OR collaborative OR integrative) NEAR/3 (review\* OR overview\*)):ti,ab,kw)  
14 OR ((pool\* NEAR/3 analy\*):ti,ab,kw) OR handsearch\*:ti,ab,kw OR 'hand search\*:ti,ab,kw OR  
15 'data syntheses\*:ti,ab,kw OR 'data extraction\*:ti,ab,kw OR 'data abstraction\*:ti,ab,kw OR  
16 metaregression\*:ti,ab,kw OR 'meta regression\*:ti,ab,kw OR [cochrane review]/lim OR  
17 [systematic review]/lim OR [meta analysis]/lim)

## APPENDIX 2 – DRAFT ELEMENTS FOR DATA CHARTING

### Bibliographic characteristics

|                                 |
|---------------------------------|
| Journal name                    |
| Year of publication             |
| Country of corresponding author |
| Funding                         |

### Review question and methods

|                                                                                                                                                                                                                       |
|-----------------------------------------------------------------------------------------------------------------------------------------------------------------------------------------------------------------------|
| Review protocol cited/provided                                                                                                                                                                                        |
| Inclusion criteria for participants: types of cancer(s), stage, other disease characteristics                                                                                                                         |
| Inclusion criteria for participants: age, sex, other demographic characteristics                                                                                                                                      |
| Inclusion criteria for participants: cancer treatment(s)                                                                                                                                                              |
| Inclusion criteria for interventions: specific supplements or categories of supplements                                                                                                                               |
| Inclusion criteria for comparators:                                                                                                                                                                                   |
| Outcomes sought from included studies (including not only domain but also instrument or scale and time frame if specified): [may break down by type eg, quality of life, adverse effect, success of cancer treatment] |
| Study designs eligible for inclusion:                                                                                                                                                                                 |
| List of databases searched                                                                                                                                                                                            |
| Total number of databases searched                                                                                                                                                                                    |
| Date of last database search                                                                                                                                                                                          |
| Quality assessment tool                                                                                                                                                                                               |
| Planned meta-analyses, subgroup analyses and sensitivity analyses                                                                                                                                                     |

Planned methods to assess the quality/certainty of effect estimate

### Review results and analyses from included\* RCTs

|                                                                              |
|------------------------------------------------------------------------------|
| Number of included RCTs                                                      |
| Number of participants in included RCTs                                      |
| Age, sex, other demographic characteristics of participants in included RCTs |
| Cancer characteristics of participants in included RCTs                      |
| Cancer treatment(s) provided to participants in included RCTs                |
| Antioxidant interventions in included RCTs                                   |
| Comparators in included RCTs:                                                |
| Outcomes present in included RCTs:                                           |
| List of meta-analyses conducted                                              |
| List of subgroup analyses conducted                                          |
| List of sensitivity analyses conducted                                       |

\*all references to included studies refer to those studies assessing effects of oral antioxidant supplement interventions during curative treatment for cancer; systematic reviews may have a broader scope.

### For each review, results for each antioxidant-related PICO question

|                                                                                   |
|-----------------------------------------------------------------------------------|
| Participant/Intervention/Comparator/Outcome/Time (may group multiple time points) |
| Are any results presented?                                                        |
| If so, were results qualitative or quantitative?                                  |
| If quantitative, what was the effect estimate?                                    |
| Quote or summary of author assessment of findings on the PICO question            |

1  
2  
3 Certainty/quality of evidence for the results (if assessed by authors)  
4

5  
6 Confidence in results of the review (see AMSTAR 2 assessment)  
7  
8  
9  
10  
11  
12  
13  
14  
15  
16  
17  
18  
19  
20  
21  
22  
23  
24  
25  
26  
27  
28  
29  
30  
31  
32  
33  
34  
35  
36  
37  
38  
39  
40  
41  
42  
43  
44  
45  
46  
47  
48  
49  
50  
51  
52  
53  
54  
55  
56  
57  
58  
59  
60



**APPENDIX 3 – AMSTAR-2 CRITERIA FOR CONFIDENCE IN THE RESULTS OF  
SYSTEMATIC REVIEWS**

| <b>AMSTAR-2 criteria [47]</b>                                                                                                                                                                                    |
|------------------------------------------------------------------------------------------------------------------------------------------------------------------------------------------------------------------|
| 1. Did the research questions and inclusion criteria for the review include the components of PICO? (Y, N)                                                                                                       |
| 2. Did the report of the review contain explicit statement that the review methods were established prior to conduct of the review? (Y, PY, N)                                                                   |
| 3. Did the review authors explain their selection of the study designs for inclusion in the review? (Y, N)                                                                                                       |
| 4. Did the reviewer authors use a comprehensive literature search strategy? (Y, PY, N)<br>CRITICAL FLAW if not Y, PY                                                                                             |
| 5. Did the review authors perform study selection in duplicate? (Y, N)                                                                                                                                           |
| 6. Did the review authors perform data extraction in duplicate? (Y, N)                                                                                                                                           |
| 7. Did the review authors provide a list of excluded studies and justify the exclusions? (Y, PY, N)                                                                                                              |
| 8. Did the review authors describe the included studies in adequate detail? (Y, PY, N)                                                                                                                           |
| 9A. RCTS- Did authors use a satisfactory technique for assessing the risk of bias (ROB) in individual studies that were included in the review? (Y, PY, N, NA- includes only NRSI)<br>CRITICAL FLAW if not Y, PY |
| 9B. NRSI- Did authors use a satisfactory technique for assessing the risk of bias (ROB) in individual studies that were included in the review? (Y, PY, N, NA- includes only RCTs)<br>CRITICAL FLAW if not Y, PY |

1  
2  
3  
4  
5  
6  
7  
8  
9  
10  
11  
12  
13  
14  
15  
16  
17  
18  
19  
20  
21  
22  
23  
24  
25  
26  
27  
28  
29  
30  
31  
32  
33  
34  
35  
36  
37  
38  
39  
40  
41  
42  
43  
44  
45  
46  
47  
48  
49  
50  
51  
52  
53  
54  
55  
56  
57  
58  
59  
60

10. Did the review authors report on the sources of funding for the included studies? (Y, N)

11A. RCTs- If meta-analysis was performed did the authors use appropriate methods for statistical combination of results? (Y,N, only NRSI, No MA)

CRITICAL FLAW if not Y, PY

11B. NRSI- If meta-analysis was performed did the authors use appropriate methods for statistical combination of results? (Y,N, only RCTs, no MA)

CRITICAL FLAW if not Y, PY

12. If meta-analysis was performed, did the review authors assess the potential impact of ROB in individual studies on the results of the meta-analysis or other evidence synthesis? (Y, N, No MA, No QA)

13. Did the review authors account for ROB in individual studies when interpreting/discussing the results of the review? (Y, N, No QA)

CRITICAL FLAW if not Y, PY

14. Did the review authors provide a satisfactory explanation for, and discussion of, any heterogeneity observed in the results of the review? (Y, N)

15. Did the review authors carry out an adequate investigation of publication bias, and discuss its likely impact on the results of the review? (Y, N)

16. Did the review authors report any potential sources of conflict of interest, including any funding they received for the review? (Y, N)

Number of critical flaws (critical items answered N):

Number of non-critical flaws (non-critical items answered N):

Rubric for overall confidence:

High confidence: no critical flaws with zero or one non-critical flaw.

1  
2  
3 Moderate confidence: no critical flaws with > 1 non-critical flaw. Multiple non-critical  
4 weaknesses may diminish confidence in the review and it may be appropriate to move the  
5 overall appraisal down from moderate to low confidence  
6  
7  
8

9  
10 Low confidence: one critical flaw with or without any non-critical flaws  
11

12 Critically low confidence: more than one 1 critical flaw with or without any non-critical flaws.  
13  
14

15 **Overall confidence in the results of the review (High/Moderate/Low/Critically Low):**  
16

17 Interpretation of quality levels:  
18

19 High: The systematic review provides an accurate and comprehensive summary of the results  
20 of the available studies that address the question of interest.  
21  
22

23 Moderate: The systematic review has more than one weakness but no critical flaws. It may  
24 provide an accurate summary of the results of the available studies that were included in the  
25 review  
26  
27  
28

29 Low: The review has a critical flaw and may not provide an accurate and comprehensive  
30 summary of the available studies that address the question of interest  
31  
32  
33

34 Critically Low: The review has more than one critical flaw and should not be relied on to  
35 provide an accurate and comprehensive summary of the available studies  
36  
37  
38  
39  
40

# Reporting checklist for protocol of a systematic review.

Based on the PRISMA-P guidelines.

## Instructions to authors

Complete this checklist by entering the page numbers from your manuscript where readers will find each of the items listed below.

Your article may not currently address all the items on the checklist. Please modify your text to include the missing information. If you are certain that an item does not apply, please write "n/a" and provide a short explanation.

Upload your completed checklist as an extra file when you submit to a journal.

In your methods section, say that you used the PRISMA-Preporting guidelines, and cite them as:

Moher D, Shamseer L, Clarke M, Ghersi D, Liberati A, Petticrew M, Shekelle P, Stewart LA. Preferred Reporting Items for Systematic Review and Meta-Analysis Protocols (PRISMA-P) 2015 statement. *Syst Rev.* 2015;4(1):1.

|                     | Reporting Item                                                                                                                                                | Page Number                                                      |
|---------------------|---------------------------------------------------------------------------------------------------------------------------------------------------------------|------------------------------------------------------------------|
| <b>Title</b>        |                                                                                                                                                               |                                                                  |
| Identification      | <a href="#">#1a</a> Identify the report as a protocol of a systematic review                                                                                  | pg 1                                                             |
| Update              | <a href="#">#1b</a> If the protocol is for an update of a previous systematic review, identify as such                                                        | N/A not an update                                                |
| <b>Registration</b> |                                                                                                                                                               |                                                                  |
|                     | <a href="#">#2</a> If registered, provide the name of the registry (such as PROSPERO) and registration number                                                 | N/A not registered as PROSPERO does not register scoping reviews |
| <b>Authors</b>      |                                                                                                                                                               |                                                                  |
| Contact             | <a href="#">#3a</a> Provide name, institutional affiliation, e-mail address of all protocol authors; provide physical mailing address of corresponding author | pg 1                                                             |
| Contribution        | <a href="#">#3b</a> Describe contributions of protocol authors and identify the guarantor of the review                                                       | pg. 18                                                           |

## 1 Amendments

2  
3 [#4](#) If the protocol represents an amendment of a N/A not an amendment  
4 previously completed or published protocol, identify as  
5 such and list changes; otherwise, state plan for  
6 documenting important protocol amendments  
7  
8  
9

## 10 Support

11  
12 Sources [#5a](#) Indicate sources of financial or other support for the pg. 18  
13 review  
14

15  
16 Sponsor [#5b](#) Provide name for the review funder and / or sponsor pg. 18  
17

18 Role of sponsor or [#5c](#) Describe roles of funder(s), sponsor(s), and / or pg. 18  
19 funder institution(s), if any, in developing the protocol  
20  
21

## 22 Introduction

23  
24 Rationale [#6](#) Describe the rationale for the review in the context of pg 5-8  
25 what is already known  
26  
27

28 Objectives [#7](#) Provide an explicit statement of the question(s) the pg 7-9  
29 review will address with reference to participants,  
30 interventions, comparators, and outcomes (PICO)  
31  
32  
33

## 34 Methods

35  
36 Eligibility criteria [#8](#) Specify the study characteristics (such as PICO, study pg 9-12  
37 design, setting, time frame) and report characteristics  
38 (such as years considered, language, publication status)  
39 to be used as criteria for eligibility for the review  
40  
41  
42

43 Information [#9](#) Describe all intended information sources (such as pg 10  
44 sources electronic databases, contact with study authors, trial  
45 registers or other grey literature sources) with planned  
46 dates of coverage  
47  
48  
49

50 Search strategy [#10](#) Present draft of search strategy to be used for at least Appendix 1  
51 one electronic database, including planned limits, such  
52 that it could be repeated  
53  
54

55 Study records - [#11a](#) Describe the mechanism(s) that will be used to manage pg 12  
56 data management records and data throughout the review  
57  
58  
59

|    |                    |                      |                                                            |                           |
|----|--------------------|----------------------|------------------------------------------------------------|---------------------------|
| 1  | Study records -    | <a href="#">#11b</a> | State the process that will be used for selecting studies  | pg 12-13                  |
| 2  | selection process  |                      | (such as two independent reviewers) through each           |                           |
| 3  |                    |                      | phase of the review (that is, screening, eligibility and   |                           |
| 4  |                    |                      | inclusion in meta-analysis)                                |                           |
| 5  |                    |                      |                                                            |                           |
| 6  |                    |                      |                                                            |                           |
| 7  |                    |                      |                                                            |                           |
| 8  | Study records -    | <a href="#">#11c</a> | Describe planned method of extracting data from            | pg 13                     |
| 9  | data collection    |                      | reports (such as piloting forms, done independently, in    |                           |
| 10 | process            |                      | duplicate), any processes for obtaining and confirming     |                           |
| 11 |                    |                      | data from investigators                                    |                           |
| 12 |                    |                      |                                                            |                           |
| 13 |                    |                      |                                                            |                           |
| 14 | Data items         | <a href="#">#12</a>  | List and define all variables for which data will be       | pg 13-14, Appendix 2      |
| 15 |                    |                      | sought (such as PICO items, funding sources), any pre-     |                           |
| 16 |                    |                      | planned data assumptions and simplifications               |                           |
| 17 |                    |                      |                                                            |                           |
| 18 |                    |                      |                                                            |                           |
| 19 |                    |                      |                                                            |                           |
| 20 | Outcomes and       | <a href="#">#13</a>  | List and define all outcomes for which data will be        | pg 13-14, Appendix 2      |
| 21 | prioritization     |                      | sought, including prioritization of main and additional    |                           |
| 22 |                    |                      | outcomes, with rationale                                   |                           |
| 23 |                    |                      |                                                            |                           |
| 24 |                    |                      |                                                            |                           |
| 25 | Risk of bias in    | <a href="#">#14</a>  | Describe anticipated methods for assessing risk of bias    | pg 14, Appendix 3         |
| 26 | individual studies |                      | of individual studies, including whether this will be      |                           |
| 27 |                    |                      | done at the outcome or study level, or both; state how     |                           |
| 28 |                    |                      | this information will be used in data synthesis            |                           |
| 29 |                    |                      |                                                            |                           |
| 30 |                    |                      |                                                            |                           |
| 31 |                    |                      |                                                            |                           |
| 32 | Data synthesis     | <a href="#">#15a</a> | Describe criteria under which study data will be           | N/A no quantitative       |
| 33 |                    |                      | quantitatively synthesised                                 | synthesis planned         |
| 34 |                    |                      |                                                            |                           |
| 35 |                    |                      |                                                            |                           |
| 36 | Data synthesis     | <a href="#">#15b</a> | If data are appropriate for quantitative synthesis,        | N/A no quantitative       |
| 37 |                    |                      | describe planned summary measures, methods of              | synthesis planned         |
| 38 |                    |                      | handling data and methods of combining data from           |                           |
| 39 |                    |                      | studies, including any planned exploration of              |                           |
| 40 |                    |                      | consistency (such as I <sup>2</sup> , Kendall's $\tau$ )   |                           |
| 41 |                    |                      |                                                            |                           |
| 42 |                    |                      |                                                            |                           |
| 43 |                    |                      |                                                            |                           |
| 44 | Data synthesis     | <a href="#">#15c</a> | Describe any proposed additional analyses (such as         | N/A no quantitative       |
| 45 |                    |                      | sensitivity or subgroup analyses, meta-regression)         | synthesis planned         |
| 46 |                    |                      |                                                            |                           |
| 47 |                    |                      |                                                            |                           |
| 48 | Data synthesis     | <a href="#">#15d</a> | If quantitative synthesis is not appropriate, describe the | pg 15                     |
| 49 |                    |                      | type of summary planned                                    |                           |
| 50 |                    |                      |                                                            |                           |
| 51 |                    |                      |                                                            |                           |
| 52 | Meta-bias(es)      | <a href="#">#16</a>  | Specify any planned assessment of meta-bias(es) (such      | N/A no quantitative       |
| 53 |                    |                      | as publication bias across studies, selective reporting    | synthesis planned         |
| 54 |                    |                      | within studies)                                            |                           |
| 55 |                    |                      |                                                            |                           |
| 56 |                    |                      |                                                            |                           |
| 57 | Confidence in      | <a href="#">#17</a>  | Describe how the strength of the body of evidence will     | N/A individual reviews to |
| 58 | cumulative         |                      | be assessed (such as GRADE)                                | be scoped but body of     |
| 59 |                    |                      |                                                            |                           |

1 evidence

evidence not assessed for  
2 confidence

3  
4 Notes:

- 5
- 6 • 1b: N/A not an update
  - 7
  - 8 • 2: N/A not registered as PROSPERO does not register scoping reviews
  - 9
  - 10
  - 11 • 4: N/A not an amendment
  - 12
  - 13 • 12: pg 13-14, Appendix 2
  - 14
  - 15 • 13: pg 13-14, Appendix 2
  - 16
  - 17 • 14: pg 14, Appendix 3
  - 18
  - 19
  - 20 • 15a: N/A no quantitative synthesis planned
  - 21
  - 22 • 15b: N/A no quantitative synthesis planned
  - 23
  - 24 • 15c: N/A no quantitative synthesis planned
  - 25
  - 26 • 16: N/A no quantitative synthesis planned
  - 27
  - 28
  - 29 • 17: N/A individual reviews to be scoped but body of evidence not assessed for confidence The PRISMA-P
  - 30 checklist is distributed under the terms of the Creative Commons Attribution License CC-BY 4.0. This
  - 31 checklist was completed on 19. November 2020 using <https://www.goodreports.org/>, a tool made by the
  - 32 [EQUATOR Network](#) in collaboration with [Penelope.ai](#)
  - 33
  - 34
  - 35
  - 36
  - 37
  - 38
  - 39
  - 40
  - 41
  - 42
  - 43
  - 44
  - 45
  - 46
  - 47
  - 48
  - 49
  - 50
  - 51
  - 52
  - 53
  - 54
  - 55
  - 56
  - 57
  - 58
  - 59
  - 60

# BMJ Open

## Risks and benefits of antioxidant dietary supplement use during cancer treatment: Protocol for a scoping review

|                                 |                                                                                                                                                                                                                                                                                                                                                                                                                                                                                                                                                                                                                                                                                                                                                                                                                                   |
|---------------------------------|-----------------------------------------------------------------------------------------------------------------------------------------------------------------------------------------------------------------------------------------------------------------------------------------------------------------------------------------------------------------------------------------------------------------------------------------------------------------------------------------------------------------------------------------------------------------------------------------------------------------------------------------------------------------------------------------------------------------------------------------------------------------------------------------------------------------------------------|
| Journal:                        | <i>BMJ Open</i>                                                                                                                                                                                                                                                                                                                                                                                                                                                                                                                                                                                                                                                                                                                                                                                                                   |
| Manuscript ID                   | bmjopen-2020-047200.R1                                                                                                                                                                                                                                                                                                                                                                                                                                                                                                                                                                                                                                                                                                                                                                                                            |
| Article Type:                   | Protocol                                                                                                                                                                                                                                                                                                                                                                                                                                                                                                                                                                                                                                                                                                                                                                                                                          |
| Date Submitted by the Author:   | 15-Feb-2021                                                                                                                                                                                                                                                                                                                                                                                                                                                                                                                                                                                                                                                                                                                                                                                                                       |
| Complete List of Authors:       | Wieland, L. Susan; University of Maryland School of Medicine, Center for Integrative Medicine<br>Moffet, Ilana; University of Michigan College of Literature Science and the Arts<br>Shade, Sydney; Geisinger Commonwealth School of Medicine<br>Emadi, Ashkan ; University of Maryland Baltimore, School of medicine; University of Maryland Marlene and Stewart Greenebaum Comprehensive Cancer Center<br>Knott, Cheryl; University System of Maryland, Department of Behavioral and Community Health; University of Maryland Marlene and Stewart Greenebaum Comprehensive Cancer Center, Community Outreach and Engagement<br>Gorman, Emily; University of Maryland Baltimore, Health Sciences and Human Services Library<br>D'Adamo, Christopher ; University of Maryland School of Medicine, Center for Integrative Medicine |
| <b>Primary Subject Heading</b>: | Oncology                                                                                                                                                                                                                                                                                                                                                                                                                                                                                                                                                                                                                                                                                                                                                                                                                          |
| Secondary Subject Heading:      | Complementary medicine                                                                                                                                                                                                                                                                                                                                                                                                                                                                                                                                                                                                                                                                                                                                                                                                            |
| Keywords:                       | CHEMOTHERAPY, COMPLEMENTARY MEDICINE, ONCOLOGY                                                                                                                                                                                                                                                                                                                                                                                                                                                                                                                                                                                                                                                                                                                                                                                    |
|                                 |                                                                                                                                                                                                                                                                                                                                                                                                                                                                                                                                                                                                                                                                                                                                                                                                                                   |

SCHOLARONE™  
Manuscripts





I, the Submitting Author has the right to grant and does grant on behalf of all authors of the Work (as defined in the below author licence), an exclusive licence and/or a non-exclusive licence for contributions from authors who are: i) UK Crown employees; ii) where BMJ has agreed a CC-BY licence shall apply, and/or iii) in accordance with the terms applicable for US Federal Government officers or employees acting as part of their official duties; on a worldwide, perpetual, irrevocable, royalty-free basis to BMJ Publishing Group Ltd ("BMJ") its licensees and where the relevant Journal is co-owned by BMJ to the co-owners of the Journal, to publish the Work in this journal and any other BMJ products and to exploit all rights, as set out in our [licence](#).

The Submitting Author accepts and understands that any supply made under these terms is made by BMJ to the Submitting Author unless you are acting as an employee on behalf of your employer or a postgraduate student of an affiliated institution which is paying any applicable article publishing charge ("APC") for Open Access articles. Where the Submitting Author wishes to make the Work available on an Open Access basis (and intends to pay the relevant APC), the terms of reuse of such Open Access shall be governed by a Creative Commons licence – details of these licences and which [Creative Commons](#) licence will apply to this Work are set out in our licence referred to above.

Other than as permitted in any relevant BMJ Author's Self Archiving Policies, I confirm this Work has not been accepted for publication elsewhere, is not being considered for publication elsewhere and does not duplicate material already published. I confirm all authors consent to publication of this Work and authorise the granting of this licence.

## **Risks and benefits of antioxidant dietary supplement use during cancer treatment:**

### **Protocol for a scoping review**

L. Susan Wieland<sup>1</sup>, Ilana Moffet<sup>2</sup>, Sydney Shade<sup>3</sup>, Ashkan Emadi<sup>4,5,6</sup>, Cheryl L. Knott<sup>4,7</sup>, Emily F. Gorman<sup>8</sup>, Christopher D'Adamo<sup>1</sup>

<sup>1</sup>Center for Integrative Medicine, University of Maryland School of Medicine, Baltimore MD

<sup>2</sup>University of Michigan College of Literature, Science, and the Arts, Ann Arbor MI

<sup>3</sup>Geisinger Commonwealth School of Medicine, Scranton PA

<sup>4</sup>University of Maryland Marlene and Stewart Greenebaum Comprehensive Cancer Center, Baltimore MD

<sup>5</sup>Department of Medicine, University of Maryland School of Medicine, Baltimore MD

<sup>6</sup>Department of Pharmacology, University of Maryland School of Medicine, Baltimore MD

<sup>7</sup>Department of Behavioral and Community Health, University of Maryland, College Park MD

<sup>8</sup>Health Sciences and Human Services Library, University of Maryland, Baltimore MD

**Author e-mails:** L. Susan Wieland [swieland@som.umaryland.edu](mailto:swieland@som.umaryland.edu) or [lswieland@gmail.com](mailto:lswieland@gmail.com);

Ilana Moffet [imoffet@umich.edu](mailto:imoffet@umich.edu); Sydney Shade [SShade@som.geisinger.edu](mailto:SShade@som.geisinger.edu); Ashkan Emadi

[aemadi@umm.edu](mailto:aemadi@umm.edu); Cheryl L. Knott [cholt14@umd.edu](mailto:cholt14@umd.edu); Emily F. Gorman

[efgorman@hshsl.umaryland.edu](mailto:efgorman@hshsl.umaryland.edu); Chris D'Adamo: [cdadamo@som.umaryland.edu](mailto:cdadamo@som.umaryland.edu)

**Corresponding author:** L. Susan Wieland, Center for Integrative Medicine, 520 W. Lombard Street, Baltimore MD 21201

**Keywords:** Dietary supplements, Antioxidants, Neoplasms, Chemotherapy

**Word count:** 4156

## ABSTRACT

**Introduction:** Antioxidant dietary supplements are used by many cancer patients to reduce the side effects of chemotherapy and improve prognosis. While some research indicates oral antioxidant supplementation reduces side effects and improves patient survival, other studies suggest the use of antioxidant dietary supplements may interfere with chemotherapy and reduce its curative effects. There is a need to clarify the evidence base on the impact of dietary antioxidant supplementation during chemotherapy on both side effect and treatment efficacy outcomes. We will use a scoping review approach to identify what systematic review evidence exists regarding beneficial and harmful effects of dietary antioxidant supplements when used during cancer treatment.

**Methods and analysis:** We will use Arksey & O'Malley and Joanna Briggs Institute methods for scoping reviews. We will systematically search PubMed, Embase, CINAHL, Scopus, Dissertations & Theses Global, and the Cochrane Library from inception to October 2020. Systematic reviews of randomized controlled trials of oral dietary antioxidant supplements used by participants receiving curative chemotherapy, radiotherapy, or other biological therapy for cancer will be eligible. Two reviewers will screen citations and full texts for inclusion and chart data on research questions from included reviews. Two reviewers will assess the overall confidence in systematic review results using AMSTAR-2, and summarized evidence will focus on reviews rated at high or moderate overall confidence. Tables will be used to map existing evidence and identify evidence gaps for safety and effectiveness outcomes.

**Ethics and dissemination:** This scoping review does not require ethical approval as it is a secondary assessment of available literature. The results will be presented at conferences and submitted for publication in a peer-reviewed journal. We will also disseminate results to

1  
2  
3 community and clinical stakeholders and involve them in developing subsequent research to  
4  
5 address critical existing gaps in the evidence as identified by the scoping review.  
6  
7  
8  
9  
10  
11  
12  
13  
14  
15  
16  
17  
18  
19  
20  
21  
22  
23  
24  
25  
26  
27  
28  
29  
30  
31  
32  
33  
34  
35  
36  
37  
38  
39  
40  
41  
42  
43  
44  
45  
46  
47  
48  
49  
50  
51  
52  
53  
54  
55  
56  
57  
58  
59  
60

## ARTICLE SUMMARY

### Strengths and limitations of this study

- This will be the first scoping review to provide an up-to-date overview of the available systematic review literature on the potential benefits and harms of antioxidant dietary supplement use during curative treatment for cancer.
- The review will focus on understanding whether existing systematic reviews have examined the relationship between the use of antioxidant dietary supplements and the therapeutic efficacy of chemotherapy.
- The review will use the AMSTAR-2 tool to distinguish between systematic reviews providing different levels of certainty for results and emphasize reviews at overall high or moderate certainty.
- Results from this scoping review will be used to further the understanding of the breadth of antioxidant dietary supplement interventions and their effects during chemotherapy and to identify current gaps in knowledge.

## INTRODUCTION

Cancer is the second leading cause of death in the United States,[1] having a significant deleterious impact on individual patients and society at large. Approximately 1 in 2 men and 1 in 3 women will develop cancer in their lifetime.[2] Cancer treatment is a broad area of research, as cancer is a complex, dynamic set of diseases, requiring newer technologies and innovative treatments with fewer adverse effects. Conventional medical therapies for those with cancer include but are not limited to chemotherapy and radiotherapy, both of which are associated with potentially debilitating side effects and reduced quality of life.[3]

Chemotherapy is a treatment approach designed to stop cancer growth either by preventing the reproduction of new cancer cells or killing cancer cells directly. Most chemotherapy drugs target the cell cycle, by altering or damaging deoxyribonucleic acid (DNA) in the cell.[4] One of the most significant causes of oxidative stress and inflammation is related to DNA damage.[5] Additionally, anti-cancer drugs cannot distinguish between cancer cells and healthy cells, which is thought to be a reason for chemotherapy's negative side effects.[4, 6] A majority of patients receiving chemotherapy report at least one side effect from the drug, most notably fatigue, nausea, vomiting, diarrhea, pain, rash, constipation, and shortness of breath.[6] For this reason, patients receiving cancer treatment often seek complementary and alternative adjuvant therapies to reduce side effects and improve quality of life.

A popular group of complementary therapies used by cancer patients is antioxidants, which can be administered through dietary interventions, intravenous infusion, or most commonly, dietary supplementation.[7] Antioxidants are substances that act to prevent or delay cellular damage, notably by stabilizing free radicals and reducing oxidative stress. The observation in laboratory studies that antioxidants decrease oxidative stress has made the use of antioxidants

1  
2  
3 common, albeit somewhat controversial, in the attempt to prevent or treat chronic disease.[8]  
4  
5 Commonly used antioxidants include vitamins, minerals, phytochemicals and other related  
6  
7 substances, and amino acids.[9]  
8  
9

10 While antioxidant supplements are popular among the general public, the evidence on  
11  
12 antioxidant supplementation to prevent chronic disease or improve health outcomes is  
13  
14 equivocal.[10-12] Although there is an increased willingness of medical professionals to use  
15  
16 complementary therapies, the belief persists among many providers that alternative therapies could  
17  
18 harm patients.[13-15] When patients use over the counter (OTC) dietary supplements without  
19  
20 informing their physician, this may increase risk of interactions with prescription medications and  
21  
22 undermine the patient-provider relationship.[16, 17]  
23  
24  
25

26 A 2016 overview concluded that antioxidant supplementation reduces adverse effects and  
27  
28 chemotoxicities from chemotherapy, though the authors noted inconsistencies in the literature.[9]  
29  
30 The most studied oral antioxidant supplement may be melatonin, shown in vitro to have anti-tumor  
31  
32 activity when used with irradiation.[18] However, while some research suggests that oral  
33  
34 antioxidant supplementation during chemotherapy may increase patient survival, other research  
35  
36 suggests that it may diminish the efficacy of the chemotherapeutic treatment.[19, 20] There is  
37  
38 concern that antioxidant therapies may interact with the cytotoxic effects of chemotherapy,  
39  
40 lessening adverse side effects and improving quality of life, but also rendering the cancer treatment  
41  
42 less effective.[21] For example, a recently published secondary data analysis from a clinical trial  
43  
44 comparing chemotherapy schedules in breast cancer identified an increased hazard of recurrence  
45  
46 in women using antioxidant supplements both before and during chemotherapy.[22]  
47  
48  
49  
50

51 We are aware of many studies over the past twenty years that discuss dietary supplements  
52  
53 during cancer treatment; several of these are systematic reviews.[9, 23-29] However, most  
54  
55  
56  
57  
58  
59  
60

1  
2  
3 systematic reviews focus on the potential reduction in chemotherapy side effects with supplements.  
4  
5 We are not aware of a review systematically collecting evidence on the relationship between  
6  
7 antioxidant supplements and therapeutic response to chemotherapy, with the exception of one  
8  
9  
10 systematic review conducted more than 10 years ago.[30] Since publication of that review, there  
11  
12 have been changes in chemotherapy regimens and antioxidant use patterns, and more current  
13  
14 systematic reviews may have captured but not highlighted relevant information on response to  
15  
16 chemotherapy. There is, therefore, a need to systematically identify the best currently available  
17  
18 evidence on this topic. Currently, there is no comprehensive overview of the literature outlining  
19  
20 the benefits and harms of antioxidant supplements for patients receiving conventional cancer  
21  
22 therapies, and evidence appears particularly scant on the question of whether antioxidant  
23  
24 supplementation may negatively interact or interfere with chemotherapeutic treatment. This  
25  
26 apparent paucity of evidence precludes the ability to make evidence-based recommendations on  
27  
28 use of antioxidant supplements by cancer patients.  
29  
30  
31

32  
33 Although we have not identified recent systematic reviews on the topic of antioxidant  
34  
35 supplementation and effectiveness of cancer therapies, we think it is possible that for some  
36  
37 antioxidants the question of a relationship between supplementation and efficacy of treatment may  
38  
39 have already been asked and possibly even answered by systematic reviews of randomized  
40  
41 controlled trials, perhaps as one component of reviews on the effects of antioxidant supplements  
42  
43 on treatment side effects. We do not wish to undertake a large systematic review on the topic if  
44  
45 some areas have already been addressed, and it is unclear if the area is ready for an overview of  
46  
47 systematic review findings, given that the topic itself may be underexplored. Our goal is to evaluate  
48  
49 the status of systematic review research questions on antioxidant oral supplementation during  
50  
51 cancer treatment, with a particular focus on whether and how antioxidant effects upon  
52  
53  
54  
55  
56  
57  
58  
59  
60



1  
2  
3 chemotherapy have been addressed. This information will provide direction, in conjunction with  
4  
5 guidance from patient and clinician stakeholders, on the next steps in addressing this critical topic.  
6

7  
8 We will use scoping review methodology to identify and compile the data from previous  
9  
10 systematic reviews of randomized controlled trials (RCTs) regarding not only the reduction of  
11  
12 chemotherapy side-effects but also the efficacy of chemotherapy when oral antioxidant  
13  
14 supplements are used in conjunction by persons with cancer. A scoping review is a form of  
15  
16 knowledge synthesis that ‘aims to map key concepts, types of evidence, and gaps in a defined area  
17  
18 or field by systematically searching, selecting, and charting available evidence.’[31] Extracting  
19  
20 information from systematic reviews will allow us to identify what is known and where there  
21  
22 remain knowledge gaps on the topic. Specifically, this paper is focused on identifying 1) to what  
23  
24 extent previous systematic reviews of RCTs have assessed the efficacy of chemotherapy in the  
25  
26 presence of adjuvant antioxidant supplementation, and 2) what is known from systematic reviews  
27  
28 of RCTs on the potential benefits and harms of adjuvant antioxidant supplementation during  
29  
30 chemotherapy for cancer, including relationships between supplementation and the efficacy of  
31  
32 chemotherapy. The results will inform future cancer research activities in this area.  
33  
34  
35  
36

### 37 **METHODS**

38  
39  
40 This protocol follows the Joanna Briggs Institute (JBI) guidance on protocols for scoping  
41  
42 reviews and has been prepared in accordance with the Preferred Reporting Items for Systematic  
43  
44 Reviews and Meta-Analysis Protocols (PRISMA-P) checklist.[32, 33] The completed scoping  
45  
46 review will be reported in accordance with the PRISMA extension for scoping reviews (PRISMA-  
47  
48 ScR).[32]  
49  
50

51 We will follow the Arksey and O’Malley scoping review framework, modified by Levac  
52  
53 2010 and JBI (2017 and 2020),[34-38] consisting of the following steps:  
54  
55  
56  
57  
58  
59  
60

- 1
- 2
- 3 (1) Identifying the research question;
- 4
- 5 (2) Identifying relevant studies;
- 6
- 7 (3) Selecting studies for inclusion;
- 8
- 9
- 10 (4) Charting data from included studies;
- 11
- 12 (5) Collating, summarizing and reporting the results;
- 13
- 14 (6) Consultation (optional, included).
- 15
- 16

### 17 **Step 1: Identifying the research question**

18  
19 The areas of uncertainty concerning the use of antioxidant supplements during chemotherapy  
20 for cancer have been described above. We will answer the following research questions:  
21

- 22
- 23
- 24 1) Among systematic reviews of RCTs on antioxidant supplements during chemotherapy, to  
25 what extent have research questions been posed regarding the effects of antioxidant  
26 supplementation on the therapeutic efficacy of chemotherapy?  
27
- 28
- 29
- 30
- 31 2) What systematic review evidence exists regarding the use of antioxidant dietary  
32 supplements during chemotherapy with respect to:  
33
- 34
- 35 a) whether supplementation with specific antioxidants promotes or attenuates the efficacy  
36 of chemotherapeutic treatment?  
37
- 38 b) improvement of chemotherapy-related side effects and quality of life? and  
39
- 40 c) adverse clinical effects potentially associated with antioxidant supplementation?  
41
- 42
- 43

### 44 **Step 2: Identifying relevant studies**

#### 45 Types of evidence sources

46  
47  
48  
49 The types of evidence of interest for this scoping review will be systematic reviews of  
50 RCTs. This is the most efficient way to identify comprehensive evaluations of available high-  
51 quality evidence. For the purposes of this scoping review, we will define systematic reviews of  
52  
53  
54  
55  
56  
57  
58  
59

1  
2  
3 RCTs as reviews that: 1) have a clear research question; 2) specify eligibility criteria for including  
4 studies; 3) seek to comprehensively identify RCTs relevant to the research question; 4) report the  
5 critical appraisal (e.g., risk of bias) of the included RCTs; and 5) present a synthesis, either  
6 quantitative or qualitative, of the characteristics and findings of the RCTs.[39] We will include  
7 systematic reviews focused on efficacy, effectiveness, or safety. We will include both published  
8 and unpublished systematic reviews but will exclude those reported solely as conference abstracts  
9 because they generally contain limited information. We will not exclude systematic reviews on the  
10 basis of language or date of publication.  
11  
12  
13  
14  
15  
16  
17  
18  
19  
20

21 While the current approach focuses on evidence from systematic reviews of RCTs, we will  
22 not exclude reviews that also seek to identify additional sources of evidence (e.g., observational  
23 studies). Furthermore, narrative (non-systematic) reviews addressing our outcomes of interest will  
24 be excluded initially but may be given secondary consideration dependent upon the quantity of  
25 systematic reviews identified. Depending on when the last search was run for the systematic  
26 reviews we identify and if time permits, we may also search for RCTs published since that date to  
27 ensure we have captured the most recently published evidence. While we believe that scoping  
28 systematic reviews of RCTs is the most practical first step in characterizing the body of evidence  
29 on this topic, the flexibility of the scoping approach permits us to extend our investigation beyond  
30 systematic reviews, if the results of our initial scoping suggests that this could be useful, and time  
31 and resources permit.  
32  
33  
34  
35  
36  
37  
38  
39  
40  
41  
42  
43  
44  
45

#### 46 Data sources and search for studies

47  
48  
49 The initial search strategy was developed by an experienced medical information specialist  
50 (EFG) in collaboration with the remainder of the review team. The search strategy will be finalized  
51 after peer-review by another experienced medical information specialist using the PRESS Peer  
52  
53  
54  
55  
56  
57  
58  
59

1  
2  
3 Review of Electronic Search Strategies.[40] Databases searched from inception will include  
4 PubMed (Pubmed.gov), Embase (Embase.com), CINAHL (EBSCOhost), Scopus (Scopus.com),  
5  
6  
7  
8  
9  
10  
11  
12  
13  
14  
15  
16  
17  
18  
19  
20  
21  
22  
23  
24  
25  
26  
27  
28  
29  
30  
31  
32  
33  
34  
35  
36  
37  
38  
39  
40  
41  
42  
43  
44  
45  
46  
47  
48  
49  
50  
51  
52  
53  
54  
55  
56  
57  
58  
59  
60

Review of Electronic Search Strategies.[40] Databases searched from inception will include PubMed (Pubmed.gov), Embase (Embase.com), CINAHL (EBSCOhost), Scopus (Scopus.com), Dissertations & Theses Global (ProQuest), and the Cochrane Library (WileyOnline). A combination of keywords and subject headings will be adapted for use according to the specifications of each database. All records retrieved will include at least one antioxidant-related term and a term related to cancer therapies. Examples of antioxidant terms include but are not limited to vitamin C, lycopene, and melatonin. Cancer therapy terms include but are not limited to chemotherapy, radiotherapy, antineoplastic, and anticancer. The initial search strategy for Embase, which resulted in retrieval of more than 7000 records, is reported in Appendix 1. In addition to screening records retrieved from searching bibliographic databases, we will search the PROSPERO database of registered systematic reviews, scan the reference lists of included reviews and contact experts in the field to identify additional relevant systematic reviews.

### Step 3: Selecting studies for inclusion

We will use the PCC (Population, Concepts and Context) framework to implement eligibility criteria for included studies.[38]

#### *Population*

Participants with cancer who are receiving chemotherapy, radiotherapy, or other biological therapy for treatment of cancer will be sought. There will be no restrictions by population characteristics (e.g., sex, age, comorbidities, geographic location), or type or stage of cancer.

#### *Concepts*

The core intervention of interest is antioxidant dietary supplements concomitant with chemotherapy, radiotherapy, or other biological therapy for cancer. We are defining antioxidant dietary supplements as orally-consumed products with known ability to prevent cellular damage

1  
2  
3 by reacting with oxidizing free radicals.[41] Antioxidant dietary supplements cover a wide range  
4  
5 of substances, including vitamins (e.g. vitamin C), minerals (e.g. selenium), amino acids (e.g. n-  
6  
7 acetylcysteine), carotenoids (e.g. lycopene), botanicals (e.g. polyphenols), and hormones (e.g.  
8  
9 melatonin). Studies involving IV administration of antioxidants in a medical setting (e.g., IV  
10  
11 vitamin C) will be excluded from this scoping review. Oral and IV antioxidants are not only  
12  
13 processed differently by the body but oral supplements may be taken by patients without direct  
14  
15 assistance of medical professionals, and thus have different clinical and public health implications.  
16  
17 Studies involving mushrooms and mushroom products will be excluded because their mechanism  
18  
19 is primarily through immunomodulation.[42] Studies involving compound herbal formulas will  
20  
21 also be excluded due to the potential for multiple mechanisms of activity that confound the  
22  
23 research question. Finally, although many foods such as fruits and vegetables are good sources of  
24  
25 antioxidants, whole food dietary interventions (e.g., changes in food habits) will also be excluded  
26  
27 from this scoping review due to the potential for confounding by non-antioxidant dietary  
28  
29 components with known activity against cancer (e.g., histone deacetylase (HDAC)-inhibition,  
30  
31 DNA methylation).[43, 44]

32  
33  
34  
35  
36  
37  
38 The core outcomes of interest will consist of 1) therapeutic response to treatment with  
39  
40 chemotherapy, radiotherapy, or other biological therapy, 2) improvements in chemotherapy-  
41  
42 related side effects and quality of life, and 3) increases in adverse effects potentially related to  
43  
44 antioxidant supplementation. Response to treatment may be measured as mortality or with  
45  
46 indicators of morbidity (e.g., cancer progression, recurrence). Because it may not be possible to  
47  
48 establish whether side effects and other adverse events are more likely related to the cancer  
49  
50 treatment or to the supplement use, we will document when adverse events are presented within  
51  
52  
53  
54  
55  
56  
57  
58  
59  
60

1  
2  
3 the reviews as side effects due to either cancer treatment or supplement use, but we will discuss  
4  
5 the findings both separately and jointly. We will include outcomes measured at any time point.  
6

### 7 *Context*

8  
9  
10 The context is cancer treatment with curative intent. The palliative use of chemotherapy,  
11  
12 radiotherapy, or other biological therapies will be excluded because a core aspect of this scoping  
13  
14 review is the evaluation of the evidence on antioxidant supplements with regard to possible  
15  
16 interference with the curative objectives of treatment. We will not restrict context by date,  
17  
18 healthcare setting or country.  
19  
20

### 21 Data management

22  
23 Citations for retrieved records will be downloaded into EndNote X8 and deduplicated.  
24  
25 Citations will then be uploaded to Covidence and screened for inclusion in two stages.[45] At the  
26  
27 first stage, two team members will independently screen all records for relevance on the basis of  
28  
29 record title and abstract. Prior to title and abstract screening, the team members will carry out a  
30  
31 pilot screening of randomly selected records, to ensure that they understand and agree upon the  
32  
33 initial inclusion criteria. During the title and abstract screening, discrepancies between screeners  
34  
35 will regularly be resolved, to prevent development and continuation of differing interpretations of  
36  
37 the inclusion criteria.[46] All records that are deemed to be potentially relevant to the scoping  
38  
39 review will progress to full text screening. Once records are ready for full text screening, a  
40  
41 calibration exercise will be performed in which all team members screen a set of the same  
42  
43 randomly selected 25 records against the inclusion and exclusion criteria for the review. The results  
44  
45 of this screening will be compared between team members, and any necessary clarifications to the  
46  
47 inclusion and exclusion criteria, or modifications of those criteria, will be made and documented  
48  
49 in the completed scoping review. After any clarification or modification of the selection criteria,  
50  
51  
52  
53  
54  
55  
56  
57  
58  
59  
60

1  
2  
3 and agreement among the team on the results of the calibration exercise, two team members will  
4 independently screen each full text record for inclusion. Discrepancies between screeners will be  
5 resolved by discussion or involvement of a third team member. The study citation and brief reason  
6 for exclusion will be provided for each excluded record and a flow chart of the screening process  
7 will be provided in accordance with PRISMA-ScR.  
8  
9

#### 14 **Step 4: Charting data from included studies**

15  
16 Data will be extracted from each included systematic review. These data will include  
17 bibliographic information (e.g., authors, date of publication, journal of publication), information  
18 on the methods (e.g. the research question, study enrollment criteria and design), information on  
19 results, and the key findings for each included review. See Appendix 2 for a draft of the data  
20 charting form displaying the elements to be extracted from each review. To ensure that the data  
21 charting form is comprehensive and clear, we will pilot test the form prior to embarking on the full  
22 data extraction. Three members of the author team will use the form to chart data from the same  
23 three reviews and compare the extracted information across authors. Anything that is unclear or  
24 missing from the data charting form will be discussed and clarifications and modifications will be  
25 addressed in collaboration with the full author team until all authors are satisfied that the data  
26 charting form is suitable for extraction of all relevant results. Data extraction will then be carried  
27 out for each study by one author and verified by a second author.  
28  
29  
30  
31  
32  
33  
34  
35  
36  
37  
38  
39  
40  
41  
42  
43

#### 44 Quality Assessment

45  
46 Although critical assessment of the evidence is optional for scoping reviews, previous  
47 research has estimated that almost one-quarter of scoping reviews do include a critical appraisal  
48 step.[47] Methodological shortcomings in the conduct of systematic reviews may lead to  
49 incomplete and biased findings and reduce our confidence in review conclusions. Because we wish  
50  
51  
52  
53  
54  
55  
56  
57  
58  
59  
60

1  
2  
3 to concentrate on available systematic review evidence in which we can have confidence, we will  
4  
5 carry out a critical assessment of the systematic reviews we find.  
6  
7

8 In addition to extracting key data from all systematic reviews, we will carry out and report  
9  
10 an assessment of the conduct of each of the included systematic reviews, using the updated version  
11  
12 of AMSTAR (A Measurement Tool to Assess Systematic Reviews) (AMSTAR-2).[48]  
13  
14 AMSTAR-2 is a critical appraisal tool for systematic review conduct that is based upon 16 yes/no  
15  
16 questions about the conduct of the review. Four of these questions are considered to be of critical  
17  
18 importance. Based upon the total number of apparent flaws in review conduct, and whether any of  
19  
20 these flaws are of critical importance, the overall confidence in the results of the systematic review  
21  
22 is rated at one of four levels: high, moderate, low, and critically low. The interpretation of an  
23  
24 overall high level of confidence is that “the systematic review provides an accurate and  
25  
26 comprehensive summary of the results of the available studies that address the question of  
27  
28 interest,” while the interpretation of an overall low level of confidence is that “the review has a  
29  
30 critical flaw and may not provide an accurate and comprehensive summary of the available studies  
31  
32 that address the question of interest.”[48] See Appendix 3 for the detailed AMSTAR-2 rating  
33  
34 criteria, rubric, and interpretation for overall assessment of confidence in review results.  
35  
36 AMSTAR-2 assessment will be carried out for each study by one author and verified by a second  
37  
38 author.  
39  
40  
41  
42  
43

44 We will highlight the charted data extracted from the reviews judged at moderate or high  
45  
46 level of confidence, and we may also extract additional data, using the methods described above  
47  
48 to develop and pilot an additional data charting form, to capture further details on the findings of  
49  
50 these reviews.  
51  
52  
53

#### 54 **Step 5: Collating, summarizing and reporting the results**

55  
56  
57  
58  
59  
60



1  
2  
3 As scoping reviews do not formally synthesize the evidence, this review will provide a  
4 descriptive summary of the evidence and map this summary against the objectives of the review.  
5  
6 For example, we will identify evidence on individual antioxidants with regard to the questions of  
7  
8 interest from each review, indicating the underlying populations (types and stages of cancer,  
9  
10 chemotherapeutic regimens) the evidence is sourced from, and the AMSTAR-2 rating of the  
11  
12 reviews providing this information. Results will be presented in tables and charts, with frequencies  
13  
14 calculated for data elements when appropriate (e.g., the number of reviews on a particular  
15  
16 antioxidant). We will conclude by discussing whether we believe there is reliable systematic  
17  
18 review evidence on the potential benefits and risks of antioxidant supplements during  
19  
20 chemotherapy and suggesting potential avenues for further research.  
21  
22  
23  
24  
25

### 26 **Step 6: Consultation**

27  
28 As described under the Data sources and search for studies, we will consult experts in the  
29  
30 field to identify additional systematic reviews not found through database searching. We will also  
31  
32 consult with stakeholders in cancer treatment (e.g., clinicians, patients) to inform the elements to  
33  
34 be included in the data charting. Through consultation with these stakeholders we will ensure that  
35  
36 relevant characteristics of the populations, interventions, and outcomes are captured and important  
37  
38 gaps in the evidence may be identified. In keeping with best practices in community-engaged  
39  
40 research, we will disseminate the findings of the review to community stakeholders and patients.  
41  
42  
43  
44  
45  
46  
47  
48  
49  
50  
51  
52  
53  
54  
55  
56  
57  
58  
59  
60  
Community engagement will also be used to inform recommendations for future research based  
on the review.

### 59 **Ethics and dissemination**

60  
This scoping review does not require ethics approval as it is a secondary review of the  
literature. Based upon the results of this review, we will disseminate our findings of both reliable

1  
2  
3 evidence (where it exists) or a gap in reliable evidence and a need for additional research. This  
4  
5 dissemination will be carried out through presentations at relevant conferences and publication in  
6  
7 a peer-reviewed open-access journal. As mentioned above, we will also disseminate the findings  
8  
9 to community and patient stakeholders. We will ask these stakeholders to join with clinical and  
10  
11 research stakeholders to identify the best ways to address any critical existing gaps in the evidence  
12  
13 (e.g., a focused systematic review, further randomized trials) and prioritize the next steps.  
14  
15

### 16 17 **Patient and public involvement**

18  
19 As described above, we will consult with patients to inform the development of data  
20  
21 charting. We will also engage with patients, clinicians and other stakeholders to disseminate  
22  
23 summaries of the review findings in appropriate formats and venues. Finally, we will involve  
24  
25 patients and the public in developing and prioritizing future research activities based upon the  
26  
27 findings of this project.  
28  
29

### 30 31 **DISCUSSION**

32  
33 The impact of oral antioxidant supplementation upon the effectiveness of curative therapies  
34  
35 for cancer is of critical importance for patients who use these supplements to reduce treatment side  
36  
37 effects and improve quality of life. Because oral antioxidant supplements are used to mitigate the  
38  
39 side effects of cancer therapies, it is expected that antioxidant supplementation will lead to better  
40  
41 tolerance for therapy, and thus to improved outcomes for patients. However, if antioxidant  
42  
43 supplements interfere with the cytotoxic effects of chemotherapy, the cancer treatment may  
44  
45 become less effective and lead to worse rather than better patient outcomes. Recent observational  
46  
47 data has suggested that antioxidant supplements during and after cancer treatment are associated  
48  
49 with an increased risk of cancer recurrence, raising concern about the place of antioxidant  
50  
51 supplements during treatment for cancer.[22]  
52  
53  
54  
55  
56  
57  
58  
59  
60

1  
2  
3 Because we are unsure to what extent the relationship between antioxidant supplements  
4 and the effectiveness of cancer therapies has been assessed in the research literature, we are  
5 conducting a scoping review to explore this. We are focusing our exploration on systematic  
6 reviews of randomized trials because they are summaries of the highest level of evidence on the  
7 effects of interventions. We believe that most systematic reviews in this area have focused on the  
8 effectiveness of supplements in ameliorating side effects and improving quality of life, but that  
9 these reviews may incorporate research questions on the effectiveness of chemotherapy in the  
10 presence of antioxidant supplementation. Identifying where these research questions have been  
11 asked, and with what results, will be a first step in identifying gaps in the evidence base and  
12 developing a plan of research to ensure that the relationship between antioxidant supplements and  
13 the effectiveness of cancer therapies is understood.  
14  
15  
16  
17  
18  
19  
20  
21  
22  
23  
24  
25  
26  
27

### 28 **Implications**

29  
30 We will use the findings from this review to develop to develop future research priorities  
31 and initiatives to help fill remaining critical gaps in the current literature and contribute to key next  
32 steps. We will then work with patients and clinicians to prioritize evidence needs, and consult with  
33 clinical, research, and patient stakeholders on the most appropriate methods (e.g., new or updated  
34 systematic reviews versus additional primary studies) for addressing these gaps. Near the end of  
35 the scoping review process, when we are able to characterize the extent of available reliable  
36 evidence, we will begin to formalize partners and processes for these next steps. Our target date  
37 for completion of this scoping review is the second half of 2021.  
38  
39  
40  
41  
42  
43  
44  
45  
46  
47  
48

### 49 **Potential limitations and mitigation strategies**

50  
51 Though scoping the entirety of observational and clinical evidence on this topic is beyond  
52 the scope of the current initiative, we believe that focusing on systematic reviews is the most  
53  
54  
55  
56  
57  
58  
59  
60

1  
2  
3 efficient first step in characterizing the weight of the current research evidence. We are also  
4  
5 uncertain about the volume of review evidence, which makes it difficult to plan ahead for either  
6  
7 superficial or very detailed data extraction. The iterative nature of scoping reviews allows us to be  
8  
9 flexible in response to the quantity and quality of the evidence and prioritize summarizing evidence  
10  
11 according to characteristics such as review quality or recency. Regular engagement with clinical  
12  
13 and research partners during the conduct of the scoping review will allow us to modify our methods  
14  
15 in such a way as to develop summaries of review evidence that are maximally relevant and useful  
16  
17 to inform practice. We plan to ensure the transparency of our methods by devoting a section of the  
18  
19 final publication to changes from and refinements to this protocol, together with the rationale for  
20  
21 any revisions. At the conclusion of this project we will develop a plan, including potential future  
22  
23 funding applications, for the next steps in a research agenda to inform decisions by patients and  
24  
25 providers on the potential benefits or harms of dietary antioxidant supplementation during  
26  
27 chemotherapy.  
28  
29  
30  
31  
32  
33  
34  
35  
36  
37  
38  
39  
40  
41  
42  
43  
44  
45  
46  
47  
48  
49  
50  
51  
52  
53  
54  
55  
56  
57  
58  
59  
60

1  
2  
3 **Acknowledgements:** We thank Becky Skidmore, MLS (Senior Information Specialist  
4 consultant, Ottawa, ON) for her peer review of the Embase search strategy. We would also like  
5 to acknowledge Drs. Brian Hutton and Chantelle Garritty (Knowledge Synthesis Group, Ottawa  
6 Hospital Research Institute) for their methodological input and guidance in developing this  
7 protocol.  
8  
9

10  
11  
12 **Author Contributions:** AE, CLK, and CD jointly conceived the study and developed the  
13 research questions. LSW proposed the scoping review methodology and developed the protocol  
14 with IM and SS. EFG developed the search strategy. LSW drafted the manuscript. All authors  
15 revised the manuscript and approved the final text. LSW is guarantor of the review.  
16  
17

18  
19 **Funding:** LSW is supported by the National Center for Complementary and Integrative Health  
20 of the National Institutes of Health (R24 AT001293). AE and CLK are supported by the  
21 University of Maryland Greenebaum Comprehensive Cancer Center Support Grant  
22 (P30CA134274) and the State of Maryland's Cigarette Restitution Funds (N/A). The funders had  
23 no role in developing the protocol.  
24  
25

26  
27 **Competing interests:** None declared.  
28

29  
30 **Patient consent for publication:** Not required.  
31

32  
33 **Data statement:** This is a secondary analysis of publicly available literature. Data sharing not  
34 applicable as no datasets generated and/or analyzed for this study.  
35  
36

#### 37 **ORCID ID**

38 L Susan Wieland <https://orcid.org/0000-0003-2157-0603>

39 Ashkan Emadi <https://orcid.org/0000-0003-3769-3210>

40 Cheryl L. Knott <https://orcid.org/0000-0002-2261-7875>

41 Emily F. Gorman <https://orcid.org/0000-0002-1210-1082>  
42  
43  
44  
45  
46  
47  
48  
49  
50  
51  
52  
53  
54  
55  
56  
57  
58  
59  
60

1  
2  
3 Christopher D'Adamo <https://orcid.org/0000-0002-2415-8158>  
4  
5  
6  
7  
8  
9  
10  
11  
12  
13  
14  
15  
16  
17  
18  
19  
20  
21  
22  
23  
24  
25  
26  
27  
28  
29  
30  
31  
32  
33  
34  
35  
36  
37  
38  
39  
40  
41  
42  
43  
44  
45  
46  
47  
48  
49  
50  
51  
52  
53  
54  
55  
56  
57  
58  
59  
60

For peer review only

## REFERENCES

1. Centers for Disease Control and Prevention. An Update on Cancer Deaths in the United States. *Atlanta, GA: US Department of Health and Human Services, Centers for Disease Control and Prevention, Division of Cancer Prevention and Control* 2020.
2. Cancer.org. Lifetime Risk of Developing or Dying From Cancer. 2020 <https://www.cancer.org/cancer/cancer-basics/lifetime-probability-of-developing-or-dying-from-cancer.html> (Accessed August 10, 2020).
3. National Cancer Institute. NCI Dictionary of Cancer Terms - Conventional Treatment. 2020. <https://www.cancer.gov/publications/dictionaries/cancer-terms/def/conventional-treatment> (Accessed August 10, 2020).
4. National Cancer Institute. NCI Dictionary of Cancer Terms - Chemotherapy. 2020. <https://www.cancer.gov/publications/dictionaries/cancer-terms/def/chemotherapy> (Accessed August 10, 2020).
5. Cellbiolabs.com. DNA Damage: Causes and Effects. 2019. <https://www.cellbiolabs.com/DNA-Damage-Causes-Effects> (Accessed August 10, 2020).
6. Pearce A, Haas M, Viney R, et al. Incidence and severity of self-reported chemotherapy side effects in routine care: A prospective cohort study. *PLoS One* 2017;12(10).
7. Kantor ED, Rehm CD, Du M, et al. Trends in dietary supplement use Among US adults from 1999-2012. *JAMA* 2016;316(14):1464-74.
8. National Center for Complementary and Integrative Health. Antioxidants in depth. 2013. <https://www.nccih.nih.gov/health/antioxidants-in-depth> (Accessed August 10, 2020).
9. Yasueda A, Urushima H, Ito T. Efficacy and interaction of antioxidant supplements as adjuvant therapy in cancer treatment: a systematic review. *Integr Cancer Ther* 2016;15(1):17-39.
10. Evans JR, Lawrenson JG. Antioxidant vitamin and mineral supplements for preventing age-related macular degeneration. *Cochrane Database Syst Rev* 2017 Jul 30;7(7):CD000253.
11. Cortés-Jofré M, Rueda J-R, Asenjo-Lobos C, et al. Drugs for preventing lung cancer in healthy people. *Cochrane Database Syst Rev* 2020 Mar 4;3(3):CD002141.
12. Huang HY, Caballero B, Chang S, et al. Multivitamin/mineral supplements and prevention of chronic disease. *Evid Rep Technol Assess* 2006(139):1-117.
13. Stub T, Quandt SA, Arcury TA, et al. Perception of risk and communication among conventional and complementary health care providers involving cancer patients' use of complementary therapies: a literature review. *BMC Complement Altern Med* 2016;16(1):353.
14. Wahner-Roedler DL, Lee MC, Chon TY, et al. Physicians' attitudes toward complementary and alternative medicine and their knowledge of specific therapies: 8-Year follow-up at an academic medical center. *Complement Ther Clin Pract* 2014;20(1):54-60.
15. Kim SH, Shin DW, Nam YS, et al. Expected and perceived efficacy of complementary and alternative medicine: A comparison views of patients with cancer and oncologists. *Complement Ther Med* 2016;28:29-36.
16. Hardy ML. Dietary supplement use in cancer care: help or harm. *Hematol Oncol Clin North Am* 2008;22(4):581-617.
17. U.S. Food and Drug Administration. Mixing Medications and Dietary Supplements Can Endanger Your Health. 2014. <https://www.fda.gov/consumers/consumer-updates/mixing-medications-and-dietary-supplements-can-endanger-your-health> (Accessed August 29, 2020).
18. Farhood B, Goradel NH, Mortezaee K, et al. Melatonin as an adjuvant in radiotherapy for radioprotection and radiosensitization. *Clin Transl Oncol* 2019;21(3):268-79.

19. Block KI, Koch AC, Mead MN, et al. Impact of antioxidant supplementation on chemotherapeutic efficacy: A systematic review of the evidence from randomized controlled trials. *Cancer Treat Rev*; 2007. p. 407-18.
20. Poljsak B, Milisav I. The role of antioxidants in cancer, friends or foes? *Curr Pharm Des* 2019;24(44):5234-44.
21. Athreya K, Xavier MF. Antioxidants in the treatment of cancer. *Nutr Cancer* 2017;69(8):1099-104.
22. Ambrosone CB, Zirpoli GR, Hutson AD, et al. Dietary supplement use during chemotherapy and survival outcomes of patients with breast cancer enrolled in a cooperative group clinical trial (SWOG S0221). *J Clin Oncol* 2020;38(8):804-14.
23. Nakayama A, Alladin KP, Igbokwe O, et al. Systematic review: generating evidence-based guidelines on the concurrent use of dietary antioxidants and chemotherapy or radiotherapy. *Cancer Invest* 2011;29(10):655-67.
24. Ladas EJ, Jacobson JS, Kennedy DD, et al. Antioxidants and cancer therapy: a systematic review. *J Clin Oncol* 2004;22(3):517-28.
25. Dennert G, Horneber M. Selenium for alleviating the side effects of chemotherapy, radiotherapy and surgery in cancer patients. *Cochrane Database Syst Rev* 2006 Jul 19(3):CD005037.
26. Chen Mh, May BH, Zhou IW, et al. Integrative medicine for relief of nausea and vomiting in the treatment of colorectal cancer using oxaliplatin-based chemotherapy: a systematic review and meta-analysis. *Phytother Res* 2016;30(5):741-53.
27. Nayeri N, Bakhshi F, Khosravi A, et al. The effect of complementary and alternative medicines on quality of life in patients with breast cancer: A systematic review. *Indian J Palliat Care* 2020;26(1):95-104.
28. Schloss JM, Colosimo M, Airey C, et al. Nutraceuticals and chemotherapy induced peripheral neuropathy (CIPN): a systematic review. *Clin Nutr* 2013;32(6):888-93.
29. Wang Y-m, Jin B-z, Ai F, et al. The efficacy and safety of melatonin in concurrent chemotherapy or radiotherapy for solid tumors: a meta-analysis of randomized controlled trials. *Cancer Chemother Pharmacol* 2012;69(5):1213-20.
30. Block KI, Koch AC, Mead MN, et al. Impact of antioxidant supplementation on chemotherapeutic efficacy: A systematic review of the evidence from randomized controlled trials. *Cancer Treat Rev* 2007;33(5):407-18.
31. Colquhoun HL, Levac D, O'Brien KK, et al. Scoping reviews: time for clarity in definition, methods, and reporting. *J Clin Epidemiol* 2014;67(12):1291-4.
32. Tricco AC, Lillie E, Zarin W, et al. PRISMA extension for scoping reviews (PRISMA-ScR): checklist and explanation. *Ann Intern Med* 2018;169(7):467-73.
33. Moher D, Shamseer L, Clarke M, et al. Preferred reporting items for systematic review and meta-analysis protocols (PRISMA-P) 2015 statement. *Syst Rev* 2015;4(1):1.
34. Arksey H, O'Malley L. Scoping studies: towards a methodological framework. *International Journal of Social Research Methodology: Theory and Practice* 2005;8(1):19-32.
35. Levac D, Colquhoun H, O'Brien KK. Scoping studies: advancing the methodology. *Implement Sci* 2010;5(1):1-9.
36. Peters MDJ, Godfrey CM, Khalil H, et al. Guidance for conducting systematic scoping reviews. *International Journal of Evidence-Based Healthcare* 2015;13(3):141-6.
37. Peters MDJ, Godfrey CM, McInerney P, et al. Chapter 11: Scoping Reviews. In: Aromataris E, Munn Z, editors. Joanna Briggs Institute Reviewer's Manual JBI, 2017.



- 1  
2  
3 38. Peters M, Godfrey C, McInerney P, et al. Chapter 11: Scoping Reviews (2020 version).  
4 In: Aromataris E, Munn Z, editors. JBI Manual for Evidence Synthesis JBI, 2020. Available  
5 from <https://synthesismanual.jbi.global>. <https://doi.org/10.46658/JBIMES-20-12> (Accessed 7  
6 October 2020).  
7  
8 39. Higgins J, Thomas J, Chandler J, et al., editors. Cochrane Handbook for Systematic  
9 Reviews of Interventions version 6.0 (updated July 2019): Cochrane; 2019 Available at  
10 [www.training.cochrane.org/handbook](http://www.training.cochrane.org/handbook).  
11  
12 40. McGowan J, Sampson M, Salzwedel DM, et al. PRESS peer review of electronic search  
13 strategies: 2015 guideline statement. *J Clin Epidemiol* 2016;75:40-6.  
14  
15 41. Trueba GP, Sanchez GM, Giuliani A. Oxygen free radical and antioxidant defense  
16 mechanism in cancer. *Front Biosci* 2004;9:2029-44.  
17  
18 42. De Silva DD, Rapior S, Fons F, et al. Medicinal mushrooms in supportive cancer  
19 therapies: an approach to anti-cancer effects and putative mechanisms of action. *Fungal*  
20 *Diversity* 2012;55:1-35.  
21  
22 43. Moreno CL, Mobbs CV. Epigenetic mechanisms underlying lifespan and age-related  
23 effects of dietary restriction and the ketogenic diet. *Mol Cell Endocrinol* 2017;455:33-40.  
24  
25 44. Fasanelli F, Giraud MT, Vineis P, et al. DNA methylation, colon cancer and  
26 Mediterranean diet: results from the EPIC-Italy cohort. *Epigenetics* 2019;14(10):977-88.  
27  
28 45. Covidence systematic review software. Veritas Health Innovation, Melbourne, Australia.  
29 Available at [www.covidence.org](http://www.covidence.org).  
30  
31 46. Polanin JR, Pigott TD, Espelage DL, et al. Best practice guidelines for abstract screening  
32 large-evidence systematic reviews and meta-analyses. *Res Synth Methods* 2019;10(3):330-42.  
33  
34 47. Pham MT, Rajic A, Greig JD, et al. A scoping review of scoping reviews: advancing the  
35 approach and enhancing the consistency. *Res Synth Methods* 2014;5(4):371-85.  
36  
37 48. Shea BJ, Reeves BC, Wells G, et al. AMSTAR 2: a critical appraisal tool for systematic  
38 reviews that include randomised or non-randomised studies of healthcare interventions, or both.  
39 *BMJ* 2017;j4008-j.  
40  
41  
42  
43  
44  
45  
46  
47  
48  
49  
50  
51  
52  
53  
54  
55  
56  
57  
58  
59  
60

## APPENDIX 1 – EMBASE PRELIMINARY SEARCH STRATEGY

**Embase (Embase.com) – 7253** references retrieved on 06 October 2020

One-line search run in Results tab of Embase.com platform:

('antioxidant'/exp OR antioxidant\*:ti,ab,kw OR 'anti-oxidant\*':ti,ab,kw OR antioxidat\*:ti,ab,kw OR 'anti-oxidat\*':ti,ab,kw OR 'antioxidant activity'/exp OR 'acetylcysteine'/exp OR acetylcystein\*:ti,ab,kw OR 'acetyl cysteine':ti,ab,kw OR acetadote:ti,ab,kw OR mucomyst:ti,ab,kw OR cetylev:ti,ab,kw OR 'arginine'/exp OR arginin\*:ti,ab,kw OR 'ascorbic acid'/exp OR 'ascorbic acid\*':ti,ab,kw OR 'vitamin c':ti,ab,kw OR ascorbate:ti,ab,kw OR 'ascorbyl palmitate':ti,ab,kw OR 'carotenoid'/exp OR caroten\*:ti,ab,kw OR 'coumarin'/exp OR coumarin\*:ti,ab,kw OR cumarin\*:ti,ab,kw OR 'curcumin'/exp OR curcumin\*:ti,ab,kw OR turmeric:ti,ab,kw OR 'ellagic acid'/exp OR 'ellagic acid\*':ti,ab,kw OR 'benzoanic acid\*':ti,ab,kw OR 'benzoaric acid\*':ti,ab,kw OR 'melatonin'/exp OR melatonin\*:ti,ab,kw OR circadin:ti,ab,kw OR 'polyphenol'/exp OR polyphenol\*:ti,ab,kw OR 'retinol'/exp OR retinol:ti,ab,kw OR 'vitamin a':ti,ab,kw OR 'retinyl palmitate':ti,ab,kw OR 'retinoic acid\*':ti,ab,kw OR 'selenium'/exp OR selenium:ti,ab,kw OR selenicum:ti,ab,kw OR 'tocopherol'/exp OR tocopherol\*:ti,ab,kw OR tocoferol:ti,ab,kw OR 'vitamin e':ti,ab,kw OR 'ubiquinone'/exp OR ubiquinone:ti,ab,kw OR 'vitamin q':ti,ab,kw OR 'coenzyme q10':ti,ab,kw OR coq10:ti,ab,kw OR 'coenzyme q':ti,ab,kw OR 'zinc'/exp OR zinc:ti,ab,kw OR zincum:ti,ab,kw OR 'thioctic acid'/exp OR 'thioctic acid\*':ti,ab,kw OR 'lipoic acid\*':ti,ab,kw OR 'resveratrol'/exp OR resveratrol:ti,ab,kw OR 'glutathione'/exp OR glutathione:ti,ab,kw OR glutathiol:ti,ab,kw OR 'chlorogenic acid'/exp OR 'chlorogenic acid\*':ti,ab,kw OR 'ferulic acid'/exp OR 'ferulic acid\*':ti,ab,kw OR 'ferulate sodium':ti,ab,kw OR 'sodium ferulate':ti,ab,kw OR 'lycopene'/exp OR lycopene:ti,ab,kw OR

1  
2  
3 'docosahexaenoic acid'/exp OR docosahexaeno\*:ti,ab,kw OR 'icosapentaenoic acid'/exp OR  
4  
5 'icosapentaenoic acid\*:ti,ab,kw OR 'eicosapentaenoic acid\*:ti,ab,kw OR 'vitamin  
6  
7 supplementation'/exp OR 'vitamin supplement\*:ti,ab,kw OR 'hibiscus'/exp OR hibiscus:ti,ab,kw  
8  
9  
10 OR 'folic acid'/exp OR 'folic acid\*:ti,ab,kw OR folate:ti,ab,kw OR 'catechin'/exp OR  
11  
12 catechin\*:ti,ab,kw OR 'catechuic acid\*:ti,ab,kw OR ciandiol:ti,ab,kw OR 'anthocyanidin'/exp  
13  
14 OR anthocyanidin:ti,ab,kw OR 'tannin'/exp OR tannin\*:ti,ab,kw OR 'tannic acid\*:ti,ab,kw OR  
15  
16 gallotanni\*:ti,ab,kw OR 'rutoside'/exp OR rutoside:ti,ab,kw OR rutin:ti,ab,kw OR  
17  
18 rutinoside:ti,ab,kw OR 'vitamin p':ti,ab,kw OR 'isoflavone'/exp OR isoflavone\*:ti,ab,kw OR  
19  
20 'quercetin'/exp OR quercetin\*:ti,ab,kw OR quercitin\*:ti,ab,kw OR quercetol\*:ti,ab,kw OR  
21  
22 'lignan'/exp OR lignan\*:ti,ab,kw OR 'allicin'/exp OR allicin:ti,ab,kw OR '5  
23  
24 methoxytryptamine'/exp OR methoxytryptamine:ti,ab,kw OR mexamine:ti,ab,kw OR 'uric  
25  
26 acid'/exp OR 'uric acid\*:ti,ab,kw OR 'urobilinogen'/exp OR urobilinogen:ti,ab,kw OR  
27  
28 urinobilinogen:ti,ab,kw OR 'melanoidin'/exp OR melanoidin:ti,ab,kw OR 'phytic acid'/exp OR  
29  
30 'phytic acid\*:ti,ab,kw OR 'phytinic acid\*:ti,ab,kw OR 'saponin'/exp OR saponin\*:ti,ab,kw OR  
31  
32 glycosaponin\*:ti,ab,kw OR 'methionine'/exp OR methionin\*:ti,ab,kw OR  
33  
34 levomethionine:ti,ab,kw OR methiolate:ti,ab,kw OR 'albumin'/exp OR albumin:ti,ab,kw OR  
35  
36 albumen:ti,ab,kw OR 'lactoferrin'/exp OR lactoferrin\*:ti,ab,kw OR lactotransferrin\*:ti,ab,kw OR  
37  
38 'chromium'/exp OR chromium:ti,ab,kw OR 'transferrin'/exp OR transferrin\*:ti,ab,kw OR  
39  
40 siderophilin:ti,ab,kw OR 'ferritin'/exp OR ferritin\*:ti,ab,kw OR immunoferritin:ti,ab,kw OR  
41  
42 'manganese'/exp OR manganese:ti,ab,kw OR cutaval:ti,ab,kw OR 'molybdenum'/exp OR  
43  
44 molybden\*:ti,ab,kw OR 'fish oil'/exp OR 'fish oil\*:ti,ab,kw OR promega:ti,ab,kw OR 'omega 3  
45  
46 fatty acid'/exp OR 'omega 3 fatty acid\*:ti,ab,kw OR 'omega 3 carboxylic acid\*:ti,ab,kw OR  
47  
48 'alternative medicine'/de OR 'alternative medicine\*:ti,ab,kw OR 'complementary  
49  
50  
51  
52  
53  
54  
55  
56  
57  
58  
59  
60

1  
2  
3 medicine\*:ti,ab,kw OR 'complementary therap\*:ti,ab,kw OR 'diet supplementation'/exp OR  
4 'diet\* supplement\*:ti,ab,kw) AND ('chemotherapy'/exp OR chemotherap\*:ti,ab,kw OR  
5 'radiotherapy'/exp OR radiotherap\*:ti,ab,kw OR 'cancer therapy'/exp OR (((cancer OR radiation  
6 OR irradiation OR tumor\* OR tumour\* OR neoplas\* OR oncolog\*) NEAR/3 (therap\* OR treat\*  
7 OR inhibit\*)):ti,ab,kw) OR 'adjuvant radiotherapy'/exp OR 'antineoplastic agent'/exp OR  
8 anticancer\*:ti,ab,kw OR 'anti-cancer\*:ti,ab,kw OR anticarcinogen\*:ti,ab,kw OR 'anti-  
9 carcinogen\*:ti,ab,kw OR 'antineoplastic activity'/exp OR antineoplastic\*:ti,ab,kw OR 'anti-  
10 neoplastic\*:ti,ab,kw OR antitumor:ti,ab,kw OR 'anti-tumor':ti,ab,kw OR antitumour:ti,ab,kw OR  
11 'anti-tumour':ti,ab,kw OR 'chemoradiotherapy'/exp OR chemoradiotherap\*:ti,ab,kw OR  
12 'alkylating agent\*:ti,ab,kw OR alkylator\*:ti,ab,kw OR 'antimetabolite'/exp OR  
13 antimetaboli\*:ti,ab,kw OR 'anti-metaboli\*:ti,ab,kw OR 'antimitotic agent'/exp OR  
14 antimitotic\*:ti,ab,kw OR 'anti-mitotic\*:ti,ab,kw OR 'mitotic inhibitor\*:ti,ab,kw OR 'mitosis  
15 inhibitor\*:ti,ab,kw OR 'anthracycline'/exp OR anthracyclin\*:ti,ab,kw OR 'protein tyrosine kinase  
16 inhibitor'/exp OR 'tyrosine kinase inhibitor\*:ti,ab,kw OR tki:ti,ab,kw OR 'tyrosine protein kinase  
17 inhibitor\*:ti,ab,kw OR 'protein serine threonine kinase inhibitor'/exp OR 'serine threonine kinase  
18 inhibitor\*:ti,ab,kw OR 'checkpoint inhibitor'/exp OR 'checkpoint inhibitor\*:ti,ab,kw OR 'anti  
19 pd1':ti,ab,kw OR 'anti pd11':ti,ab,kw OR 'antimyeloma activity'/exp OR antimyeloma\*:ti,ab,kw  
20 OR 'anti-myeloma\*:ti,ab,kw OR 'dna topoisomerase inhibitor'/exp OR 'topoisomerase  
21 inhibitor\*:ti,ab,kw OR 'topoisomerase 1 inhibitor\*:ti,ab,kw OR 'topoisomerase i  
22 inhibitor\*:ti,ab,kw OR 'antiandrogen'/exp OR 'antiandrogen therapy'/exp OR 'anti-  
23 androgen\*:ti,ab,kw OR antiandrogen\*:ti,ab,kw OR 'androgen antagonist\*:ti,ab,kw OR  
24 'antiestrogen'/exp OR 'anti-estrogen\*:ti,ab,kw OR 'anti-oestrogen\*:ti,ab,kw OR  
25 antiestrogen\*:ti,ab,kw OR antioestrogen\*:ti,ab,kw OR 'estrogen antagonist\*:ti,ab,kw OR

1  
2  
3 'oestrogen antagonist\*':ti,ab,kw OR 'cancer hormone therapy'/exp OR 'cancer hormone  
4 therap\*':ti,ab,kw OR 'cancer patient'/exp OR 'cancer patient\*':ti,ab,kw OR 'oncolog\*  
5 patient\*':ti,ab,kw OR electrochemotherap\*':ti,ab,kw OR photochemotherap\*':ti,ab,kw OR  
6 chemoembolization:ti,ab,kw OR chemoembolisation:ti,ab,kw OR carcinochemotherap\*':ti,ab,kw  
7 OR multichemotherap\*':ti,ab,kw OR polychemotherap\*':ti,ab,kw OR antileukemi\*':ti,ab,kw OR  
8 'anti-leukemi\*':ti,ab,kw OR antileukaemi\*':ti,ab,kw OR 'anti-leukaemi\*':ti,ab,kw OR  
9 antimetasta\*':ti,ab,kw OR 'anti-metasta\*':ti,ab,kw OR antimutagen\*':ti,ab,kw OR 'anti-  
10 mutagen\*':ti,ab,kw) AND (metaanaly\*':ti,ab,kw OR 'met analy\*':ti,ab,kw OR 'meta  
11 analy\*':ti,ab,kw OR metanaly\*':ti,ab,kw OR 'meta analysis'/exp OR 'meta analysis (topic)'/exp  
12 OR 'systematic review'/exp OR 'systematic review (topic)'/exp OR (((systematic\* OR  
13 methodologic\* OR collaborative OR integrative) NEAR/3 (review\* OR overview\*)):ti,ab,kw)  
14 OR ((pool\* NEAR/3 analy\*):ti,ab,kw) OR handsearch\*':ti,ab,kw OR 'hand search\*':ti,ab,kw OR  
15 'data syntheses\*':ti,ab,kw OR 'data extraction\*':ti,ab,kw OR 'data abstraction\*':ti,ab,kw OR  
16 metaregression\*':ti,ab,kw OR 'meta regression\*':ti,ab,kw OR [cochrane review]/lim OR  
17 [systematic review]/lim OR [meta analysis]/lim)  
18  
19  
20  
21  
22  
23  
24  
25  
26  
27  
28  
29  
30  
31  
32  
33  
34  
35  
36  
37  
38  
39  
40  
41  
42  
43  
44  
45  
46  
47  
48  
49  
50  
51  
52  
53  
54  
55  
56  
57  
58  
59  
60

## APPENDIX 2 – DRAFT ELEMENTS FOR DATA CHARTING

### Bibliographic characteristics

|                                 |
|---------------------------------|
| Journal name                    |
| Year of publication             |
| Country of corresponding author |
| Funding                         |

### Review question and methods

|                                                                                                                                                                                                                       |
|-----------------------------------------------------------------------------------------------------------------------------------------------------------------------------------------------------------------------|
| Review protocol cited/provided                                                                                                                                                                                        |
| Inclusion criteria for participants: types of cancer(s), stage, other disease characteristics                                                                                                                         |
| Inclusion criteria for participants: age, sex, other demographic characteristics                                                                                                                                      |
| Inclusion criteria for participants: cancer treatment(s)                                                                                                                                                              |
| Inclusion criteria for interventions: specific supplements or categories of supplements                                                                                                                               |
| Inclusion criteria for comparators:                                                                                                                                                                                   |
| Outcomes sought from included studies (including not only domain but also instrument or scale and time frame if specified): [may break down by type eg, quality of life, adverse effect, success of cancer treatment] |
| Study designs eligible for inclusion:                                                                                                                                                                                 |
| List of databases searched                                                                                                                                                                                            |
| Total number of databases searched                                                                                                                                                                                    |
| Date of last database search                                                                                                                                                                                          |
| Quality assessment tool                                                                                                                                                                                               |
| Planned meta-analyses, subgroup analyses and sensitivity analyses                                                                                                                                                     |

Planned methods to assess the quality/certainty of effect estimate

### Review results and analyses from included\* RCTs

|                                                                              |
|------------------------------------------------------------------------------|
| Number of included RCTs                                                      |
| Number of participants in included RCTs                                      |
| Age, sex, other demographic characteristics of participants in included RCTs |
| Cancer characteristics of participants in included RCTs                      |
| Cancer treatment(s) provided to participants in included RCTs                |
| Antioxidant interventions in included RCTs                                   |
| Comparators in included RCTs:                                                |
| Outcomes present in included RCTs:                                           |
| List of meta-analyses conducted                                              |
| List of subgroup analyses conducted                                          |
| List of sensitivity analyses conducted                                       |

\*all references to included studies refer to those studies assessing effects of oral antioxidant supplement interventions during curative treatment for cancer; systematic reviews may have a broader scope.

### For each review, results for each antioxidant-related PICO question

|                                                                                   |
|-----------------------------------------------------------------------------------|
| Participant/Intervention/Comparator/Outcome/Time (may group multiple time points) |
| Are any results presented?                                                        |
| If so, were results qualitative or quantitative?                                  |
| If quantitative, what was the effect estimate?                                    |
| Quote or summary of author assessment of findings on the PICO question            |

1  
2  
3 Certainty/quality of evidence for the results (if assessed by authors)  
4

5  
6 Confidence in results of the review (see AMSTAR 2 assessment)  
7  
8  
9  
10  
11  
12  
13  
14  
15  
16  
17  
18  
19  
20  
21  
22  
23  
24  
25  
26  
27  
28  
29  
30  
31  
32  
33  
34  
35  
36  
37  
38  
39  
40  
41  
42  
43  
44  
45  
46  
47  
48  
49  
50  
51  
52  
53  
54  
55  
56  
57  
58  
59  
60



**APPENDIX 3 – AMSTAR-2 CRITERIA FOR CONFIDENCE IN THE RESULTS OF  
SYSTEMATIC REVIEWS**

| <b>AMSTAR-2 criteria [47]</b>                                                                                                                                                                                           |
|-------------------------------------------------------------------------------------------------------------------------------------------------------------------------------------------------------------------------|
| 1. Did the research questions and inclusion criteria for the review include the components of PICO? (Y, N)                                                                                                              |
| 2. Did the report of the review contain explicit statement that the review methods were established prior to conduct of the review? (Y, PY, N)                                                                          |
| 3. Did the review authors explain their selection of the study designs for inclusion in the review? (Y, N)                                                                                                              |
| 4. Did the reviewer authors use a comprehensive literature search strategy? (Y, PY, N)<br><b>CRITICAL FLAW if not Y, PY</b>                                                                                             |
| 5. Did the review authors perform study selection in duplicate? (Y, N)                                                                                                                                                  |
| 6. Did the review authors perform data extraction in duplicate? (Y, N)                                                                                                                                                  |
| 7. Did the review authors provide a list of excluded studies and justify the exclusions? (Y, PY, N)                                                                                                                     |
| 8. Did the review authors describe the included studies in adequate detail? (Y, PY, N)                                                                                                                                  |
| 9A. RCTS- Did authors use a satisfactory technique for assessing the risk of bias (ROB) in individual studies that were included in the review? (Y, PY, N, NA- includes only NRSI)<br><b>CRITICAL FLAW if not Y, PY</b> |
| 9B. NRSI- Did authors use a satisfactory technique for assessing the risk of bias (ROB) in individual studies that were included in the review? (Y, PY, N, NA- includes only RCTs)<br><b>CRITICAL FLAW if not Y, PY</b> |

1  
2  
3  
4  
5  
6  
7  
8  
9  
10  
11  
12  
13  
14  
15  
16  
17  
18  
19  
20  
21  
22  
23  
24  
25  
26  
27  
28  
29  
30  
31  
32  
33  
34  
35  
36  
37  
38  
39  
40  
41  
42  
43  
44  
45  
46  
47  
48  
49  
50  
51  
52  
53  
54  
55  
56  
57  
58  
59  
60

10. Did the review authors report on the sources of funding for the included studies? (Y, N)

11A. RCTs- If meta-analysis was performed did the authors use appropriate methods for statistical combination of results? (Y,N, only NRSI, No MA)

CRITICAL FLAW if not Y, PY

11B. NRSI- If meta-analysis was performed did the authors use appropriate methods for statistical combination of results? (Y,N, only RCTs, no MA)

CRITICAL FLAW if not Y, PY

12. If meta-analysis was performed, did the review authors assess the potential impact of ROB in individual studies on the results of the meta-analysis or other evidence synthesis? (Y, N, No MA, No QA)

13. Did the review authors account for ROB in individual studies when interpreting/discussing the results of the review? (Y, N, No QA)

CRITICAL FLAW if not Y, PY

14. Did the review authors provide a satisfactory explanation for, and discussion of, any heterogeneity observed in the results of the review? (Y, N)

15. Did the review authors carry out an adequate investigation of publication bias, and discuss its likely impact on the results of the review? (Y, N)

16. Did the review authors report any potential sources of conflict of interest, including any funding they received for the review? (Y, N)

Number of critical flaws (critical items answered N):

Number of non-critical flaws (non-critical items answered N):

Rubric for overall confidence:

High confidence: no critical flaws with zero or one non-critical flaw.

1  
2  
3 Moderate confidence: no critical flaws with > 1 non-critical flaw. Multiple non-critical  
4 weaknesses may diminish confidence in the review and it may be appropriate to move the  
5 overall appraisal down from moderate to low confidence  
6  
7  
8

9  
10 Low confidence: one critical flaw with or without any non-critical flaws  
11

12 Critically low confidence: more than one 1 critical flaw with or without any non-critical flaws.  
13  
14

15 **Overall confidence in the results of the review (High/Moderate/Low/Critically Low):**  
16

17 Interpretation of quality levels:  
18

19 High: The systematic review provides an accurate and comprehensive summary of the results  
20 of the available studies that address the question of interest.  
21  
22

23 Moderate: The systematic review has more than one weakness but no critical flaws. It may  
24 provide an accurate summary of the results of the available studies that were included in the  
25 review  
26  
27  
28

29 Low: The review has a critical flaw and may not provide an accurate and comprehensive  
30 summary of the available studies that address the question of interest  
31  
32  
33

34 Critically Low: The review has more than one critical flaw and should not be relied on to  
35 provide an accurate and comprehensive summary of the available studies  
36  
37  
38  
39  
40

# Reporting checklist for protocol of a systematic review.

Based on the PRISMA-P guidelines.

## Instructions to authors

Complete this checklist by entering the page numbers from your manuscript where readers will find each of the items listed below.

Your article may not currently address all the items on the checklist. Please modify your text to include the missing information. If you are certain that an item does not apply, please write "n/a" and provide a short explanation.

Upload your completed checklist as an extra file when you submit to a journal.

In your methods section, say that you used the PRISMA-Preporting guidelines, and cite them as:

Moher D, Shamseer L, Clarke M, Ghersi D, Liberati A, Petticrew M, Shekelle P, Stewart LA. Preferred Reporting Items for Systematic Review and Meta-Analysis Protocols (PRISMA-P) 2015 statement. *Syst Rev.* 2015;4(1):1.

|                     | Reporting Item                                                                                                                                                | Page Number                                                      |
|---------------------|---------------------------------------------------------------------------------------------------------------------------------------------------------------|------------------------------------------------------------------|
| <b>Title</b>        |                                                                                                                                                               |                                                                  |
| Identification      | <a href="#">#1a</a> Identify the report as a protocol of a systematic review                                                                                  | pg 1                                                             |
| Update              | <a href="#">#1b</a> If the protocol is for an update of a previous systematic review, identify as such                                                        | N/A not an update                                                |
| <b>Registration</b> |                                                                                                                                                               |                                                                  |
|                     | <a href="#">#2</a> If registered, provide the name of the registry (such as PROSPERO) and registration number                                                 | N/A not registered as PROSPERO does not register scoping reviews |
| <b>Authors</b>      |                                                                                                                                                               |                                                                  |
| Contact             | <a href="#">#3a</a> Provide name, institutional affiliation, e-mail address of all protocol authors; provide physical mailing address of corresponding author | pg 1                                                             |
| Contribution        | <a href="#">#3b</a> Describe contributions of protocol authors and identify the guarantor of the review                                                       | pg. 18                                                           |

## 1 Amendments

2  
3 [#4](#) If the protocol represents an amendment of a N/A not an amendment  
4 previously completed or published protocol, identify as  
5 such and list changes; otherwise, state plan for  
6 documenting important protocol amendments  
7  
8  
9

## 10 Support

11  
12 Sources [#5a](#) Indicate sources of financial or other support for the pg. 18  
13 review  
14

15  
16 Sponsor [#5b](#) Provide name for the review funder and / or sponsor pg. 18  
17

18 Role of sponsor or [#5c](#) Describe roles of funder(s), sponsor(s), and / or pg. 18  
19 funder institution(s), if any, in developing the protocol  
20  
21

## 22 Introduction

23  
24 Rationale [#6](#) Describe the rationale for the review in the context of pg 5-8  
25 what is already known  
26  
27

28 Objectives [#7](#) Provide an explicit statement of the question(s) the pg 7-9  
29 review will address with reference to participants,  
30 interventions, comparators, and outcomes (PICO)  
31  
32  
33

## 34 Methods

35  
36 Eligibility criteria [#8](#) Specify the study characteristics (such as PICO, study pg 9-12  
37 design, setting, time frame) and report characteristics  
38 (such as years considered, language, publication status)  
39 to be used as criteria for eligibility for the review  
40  
41  
42

43 Information [#9](#) Describe all intended information sources (such as pg 10  
44 sources electronic databases, contact with study authors, trial  
45 registers or other grey literature sources) with planned  
46 dates of coverage  
47  
48  
49

50 Search strategy [#10](#) Present draft of search strategy to be used for at least Appendix 1  
51 one electronic database, including planned limits, such  
52 that it could be repeated  
53  
54

55 Study records - [#11a](#) Describe the mechanism(s) that will be used to manage pg 12  
56 data management records and data throughout the review  
57  
58  
59

|    |                    |                      |                                                            |                           |
|----|--------------------|----------------------|------------------------------------------------------------|---------------------------|
| 1  | Study records -    | <a href="#">#11b</a> | State the process that will be used for selecting studies  | pg 12-13                  |
| 2  | selection process  |                      | (such as two independent reviewers) through each           |                           |
| 3  |                    |                      | phase of the review (that is, screening, eligibility and   |                           |
| 4  |                    |                      | inclusion in meta-analysis)                                |                           |
| 5  |                    |                      |                                                            |                           |
| 6  |                    |                      |                                                            |                           |
| 7  |                    |                      |                                                            |                           |
| 8  | Study records -    | <a href="#">#11c</a> | Describe planned method of extracting data from            | pg 13                     |
| 9  | data collection    |                      | reports (such as piloting forms, done independently, in    |                           |
| 10 | process            |                      | duplicate), any processes for obtaining and confirming     |                           |
| 11 |                    |                      | data from investigators                                    |                           |
| 12 |                    |                      |                                                            |                           |
| 13 |                    |                      |                                                            |                           |
| 14 | Data items         | <a href="#">#12</a>  | List and define all variables for which data will be       | pg 13-14, Appendix 2      |
| 15 |                    |                      | sought (such as PICO items, funding sources), any pre-     |                           |
| 16 |                    |                      | planned data assumptions and simplifications               |                           |
| 17 |                    |                      |                                                            |                           |
| 18 |                    |                      |                                                            |                           |
| 19 |                    |                      |                                                            |                           |
| 20 | Outcomes and       | <a href="#">#13</a>  | List and define all outcomes for which data will be        | pg 13-14, Appendix 2      |
| 21 | prioritization     |                      | sought, including prioritization of main and additional    |                           |
| 22 |                    |                      | outcomes, with rationale                                   |                           |
| 23 |                    |                      |                                                            |                           |
| 24 |                    |                      |                                                            |                           |
| 25 | Risk of bias in    | <a href="#">#14</a>  | Describe anticipated methods for assessing risk of bias    | pg 14, Appendix 3         |
| 26 | individual studies |                      | of individual studies, including whether this will be      |                           |
| 27 |                    |                      | done at the outcome or study level, or both; state how     |                           |
| 28 |                    |                      | this information will be used in data synthesis            |                           |
| 29 |                    |                      |                                                            |                           |
| 30 |                    |                      |                                                            |                           |
| 31 |                    |                      |                                                            |                           |
| 32 | Data synthesis     | <a href="#">#15a</a> | Describe criteria under which study data will be           | N/A no quantitative       |
| 33 |                    |                      | quantitatively synthesised                                 | synthesis planned         |
| 34 |                    |                      |                                                            |                           |
| 35 |                    |                      |                                                            |                           |
| 36 | Data synthesis     | <a href="#">#15b</a> | If data are appropriate for quantitative synthesis,        | N/A no quantitative       |
| 37 |                    |                      | describe planned summary measures, methods of              | synthesis planned         |
| 38 |                    |                      | handling data and methods of combining data from           |                           |
| 39 |                    |                      | studies, including any planned exploration of              |                           |
| 40 |                    |                      | consistency (such as I <sup>2</sup> , Kendall's $\tau$ )   |                           |
| 41 |                    |                      |                                                            |                           |
| 42 |                    |                      |                                                            |                           |
| 43 |                    |                      |                                                            |                           |
| 44 | Data synthesis     | <a href="#">#15c</a> | Describe any proposed additional analyses (such as         | N/A no quantitative       |
| 45 |                    |                      | sensitivity or subgroup analyses, meta-regression)         | synthesis planned         |
| 46 |                    |                      |                                                            |                           |
| 47 |                    |                      |                                                            |                           |
| 48 | Data synthesis     | <a href="#">#15d</a> | If quantitative synthesis is not appropriate, describe the | pg 15                     |
| 49 |                    |                      | type of summary planned                                    |                           |
| 50 |                    |                      |                                                            |                           |
| 51 |                    |                      |                                                            |                           |
| 52 | Meta-bias(es)      | <a href="#">#16</a>  | Specify any planned assessment of meta-bias(es) (such      | N/A no quantitative       |
| 53 |                    |                      | as publication bias across studies, selective reporting    | synthesis planned         |
| 54 |                    |                      | within studies)                                            |                           |
| 55 |                    |                      |                                                            |                           |
| 56 |                    |                      |                                                            |                           |
| 57 | Confidence in      | <a href="#">#17</a>  | Describe how the strength of the body of evidence will     | N/A individual reviews to |
| 58 | cumulative         |                      | be assessed (such as GRADE)                                | be scoped but body of     |
| 59 |                    |                      |                                                            |                           |

1 evidence

evidence not assessed for  
confidence

2  
3  
4 Notes:

- 5
- 6 • 1b: N/A not an update
  - 7
  - 8 • 2: N/A not registered as PROSPERO does not register scoping reviews
  - 9
  - 10
  - 11 • 4: N/A not an amendment
  - 12
  - 13 • 12: pg 13-14, Appendix 2
  - 14
  - 15 • 13: pg 13-14, Appendix 2
  - 16
  - 17 • 14: pg 14, Appendix 3
  - 18
  - 19
  - 20 • 15a: N/A no quantitative synthesis planned
  - 21
  - 22 • 15b: N/A no quantitative synthesis planned
  - 23
  - 24 • 15c: N/A no quantitative synthesis planned
  - 25
  - 26 • 16: N/A no quantitative synthesis planned
  - 27
  - 28
  - 29 • 17: N/A individual reviews to be scoped but body of evidence not assessed for confidence The PRISMA-P
  - 30 checklist is distributed under the terms of the Creative Commons Attribution License CC-BY 4.0. This
  - 31 checklist was completed on 19. November 2020 using <https://www.goodreports.org/>, a tool made by the
  - 32 [EQUATOR Network](#) in collaboration with [Penelope.ai](#)
  - 33
  - 34
  - 35
  - 36
  - 37
  - 38
  - 39
  - 40
  - 41
  - 42
  - 43
  - 44
  - 45
  - 46
  - 47
  - 48
  - 49
  - 50
  - 51
  - 52
  - 53
  - 54
  - 55
  - 56
  - 57
  - 58
  - 59
  - 60
